# Supplementary material for: Genome-Guided Insights into the Plant Growth Promotion Capabilities of the Physiologically Versatile Bacillus aryabhattai Strain AB211
Source: PubMed Central journal article supplement (PMC5359284; doi:10.3389/fmicb.2017.00411), 2017-03-21
Supplement: Data_Sheet_1.pdf [file Data_Sheet_1.pdf]

## Genome-guided insights into the plant growth promotion capabilities of the physiologically versatile *Bacillus aryabhatai* strain AB211

Chandrima Bhattacharyya, Utpal Bakshi, Ivy Mallick, Shayantan Mukherji, Biswajit Bera, Abhrajyoti Ghosh

### Supplementary Figures

#### Content

Supplementary Figure S1: Phylogenetic analysis using A) Core genome SNP and B) Pan-genomic binary data matrix. Core and Pan Genome phylogeny are constructed in BPGA pipeline with default setting. Bootstrap values are also indicated in both trees.

Supplementary Figure S2: Average nucleotide identity (ANI) using A) best hits (one-way ANI) and B) reciprocal best hits (two-way ANI) between genome sequences of *Bacillus aryabhatai* AB211 and *Bacillus megaterium* Q3. Mean and median values of identity and bit score distribution are also shown in the figure.

Supplementary Figure S3: Genome wide syntany analysis of A) *Bacillus aryabhatai* AB211 with complete genome sequences of *Bacillus megaterium* Q3. The different window length and parameters chosen for identifying syntanic blocks are also given; and B) LCB analysis in progressive MAUVE showing locally collinear blocks among genomes of *Bacillus aryabhatai*.

Supplementary Figure S4: The Core and Pan-Genomes of *B. aryabhatai* as compared with *B. megaterium* strains. Number of shared or core genes (pink) and total number of genes or pan-genome (green) curve for 13 strains. The upper and lower edges of the boxes indicate the first quartile (25th percentile of the data) and third quartile (75th percentile), respectively, of 100 random different input orders of the genomes. The central horizontal line indicates the sample median (50th percentile). At 13 sequenced genomes, the core-genome constitutes of 3558 genes, whereas the pan-genome has 7392 total genes.

Supplementary Figure S5: GC% of *B. aryabhatai* strain AB211. GC% of individual genes are shown in blue line, whereas the red line indicate genomic GC% of *B. aryabhatai* strain AB211.

Supplementary Figure S6: (A) Landscape of metabolic versatility of *Bacillus aryabhatai* AB211. Qualitative characteristics: carbon source/  $e^-$  donor, antibiotics, heavy metals, phosphate solubilization, siderophore production, EPS synthesis, IAA production, motility and other biochemical characteristics as per

Bergey's manual. (B) Biolog assay for strain AB211. 71 carbon sources and 23 chemical utilization characteristics were examined in this study. Presence of a positive reaction was assigned with the colour green, and negative reaction was assigned a colour red.

Supplementary Figure S7: (A) Siderophore production by *B. aryabhatai* AB211. (B) IAA production at different concentrations of tryptophan by strain AB211. (C) Plant growth promotion activity of strain AB211 using maize seedlings. (D) Motility of strain AB211.

Supplementary Figure S8: Synthesis of IAA based on the annotation of the AB211 genome.

Supplementary Figure S9: Extent of *B. aryabhatai* AB211 cfu in rhizospheric soil mix on different sampling dates commencing from the date of AB211 application (day-0) as per the cfu estimations on selective NA (cumulative of cfu recorded on day-0, day-7, and day-15; vertical bars indicate standard deviation).

Supplementary Figure S1: Phylogenetic analysis using A) Core genome SNP and B) Pan-genomic binary data matrix. Core and Pan Genome phylogeny are constructed in BPGA pipeline with default setting. Bootstrap values are also indicated in both trees.

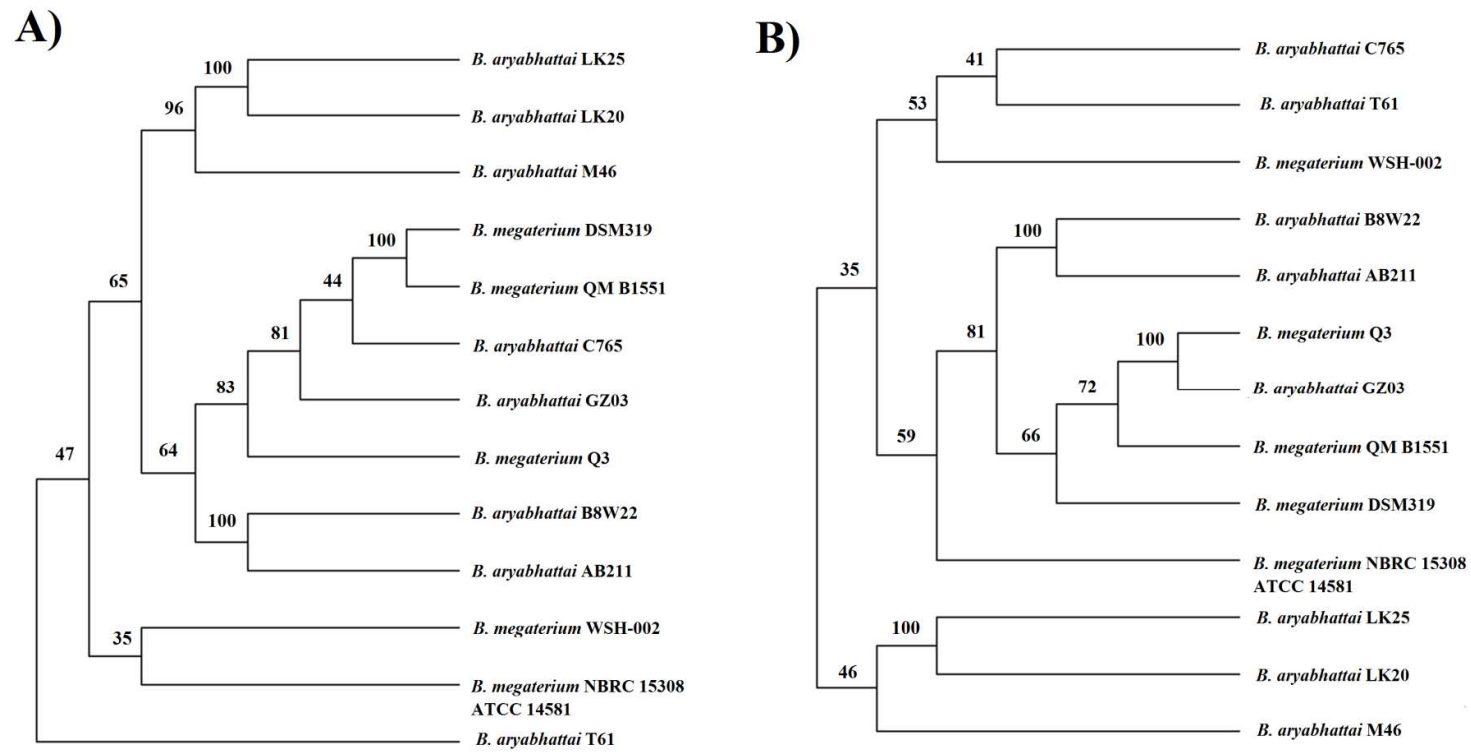

Supplementary Figure S2: Average nucleotide identity (ANI) using A) best hits (one-way ANI) and B) reciprocal best hits (two-way ANI) between genome sequences of *Bacillus aryabhatai* AB211 and *Bacillus megaterium* Q3. Mean and median values of identity and bit score distribution are also shown in the figure.

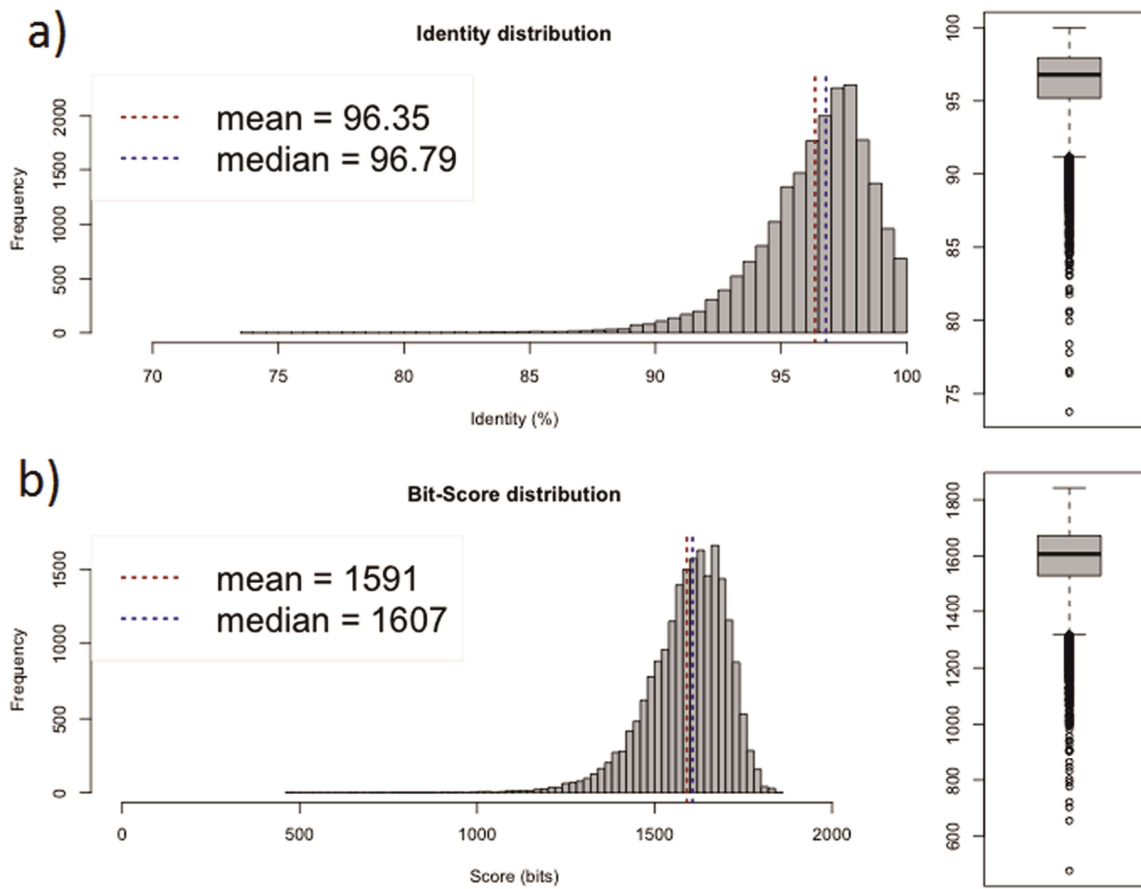

Supplementary Figure S3: Genome wide syntany analysis of A) *Bacillus aryabhatai* AB211 with complete genome sequences of *Bacillus megaterium* Q3. The different window length and parameters chosen for identifying syntanic blocks are also given; and B) LCB analysis in progressive MAUVE showing locally collinear blocks among genomes of *Bacillus aryabhatai*.

Supplementary Figure S3A

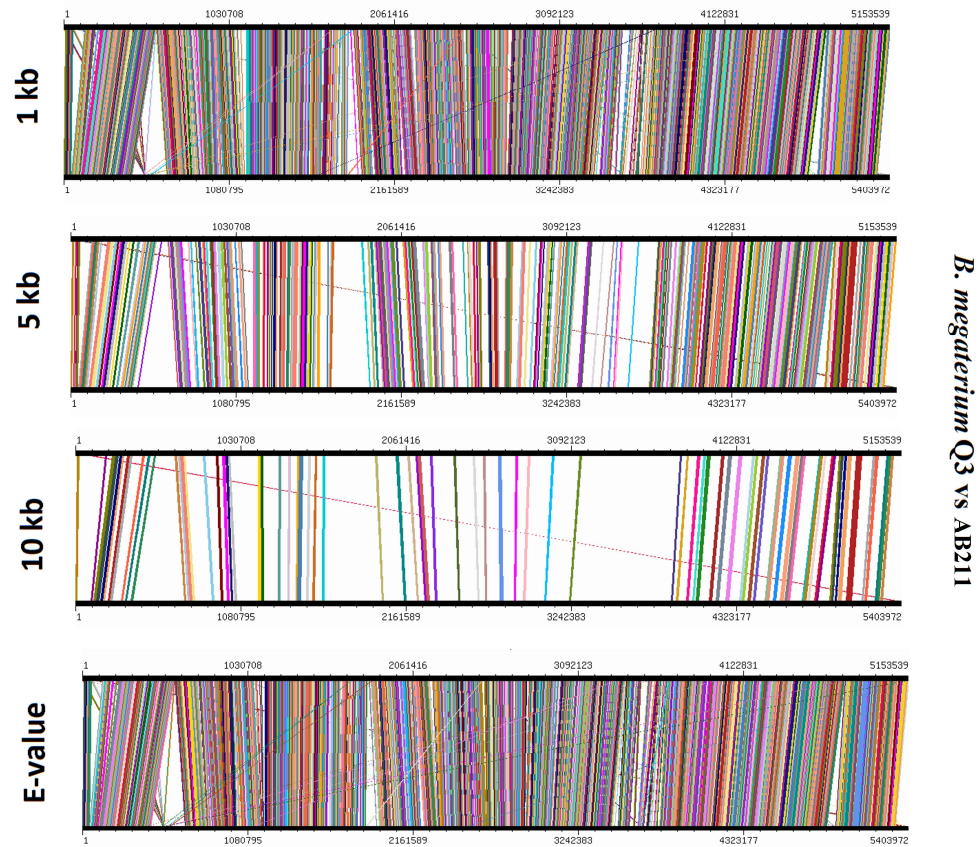

Supplementary Figure S3B

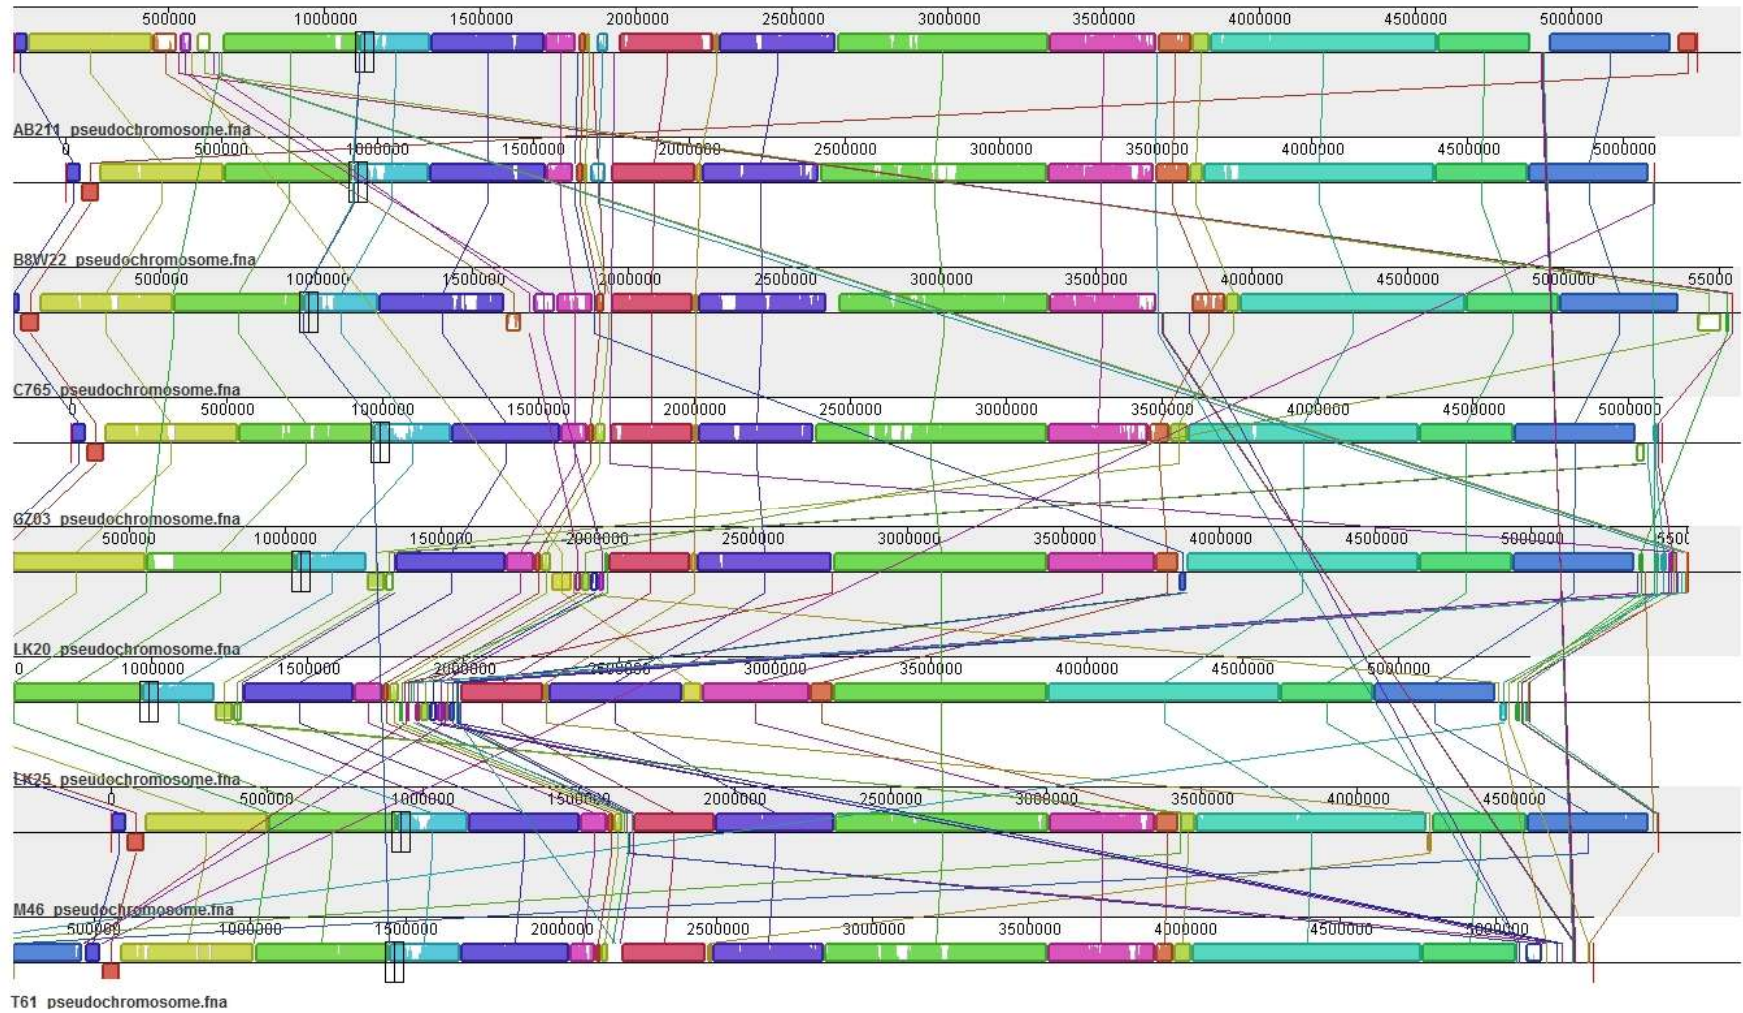

Supplementary Figure S4: The Core and Pan-Genomes of *B. aryabhatai* as compared with *B. megaterium* strains. Number of shared or core genes (pink) and total number of genes or pan-genome (green) curve for 13 strains. The upper and lower edges of the boxes indicate the first quartile (25th percentile of the data) and third quartile (75th percentile), respectively, of 100 random different input orders of the genomes. The central horizontal line indicates the sample median (50th percentile). At 13 sequenced genomes, the core-genome constitutes of 3558 genes, whereas the pan-genome has 7392 total genes.

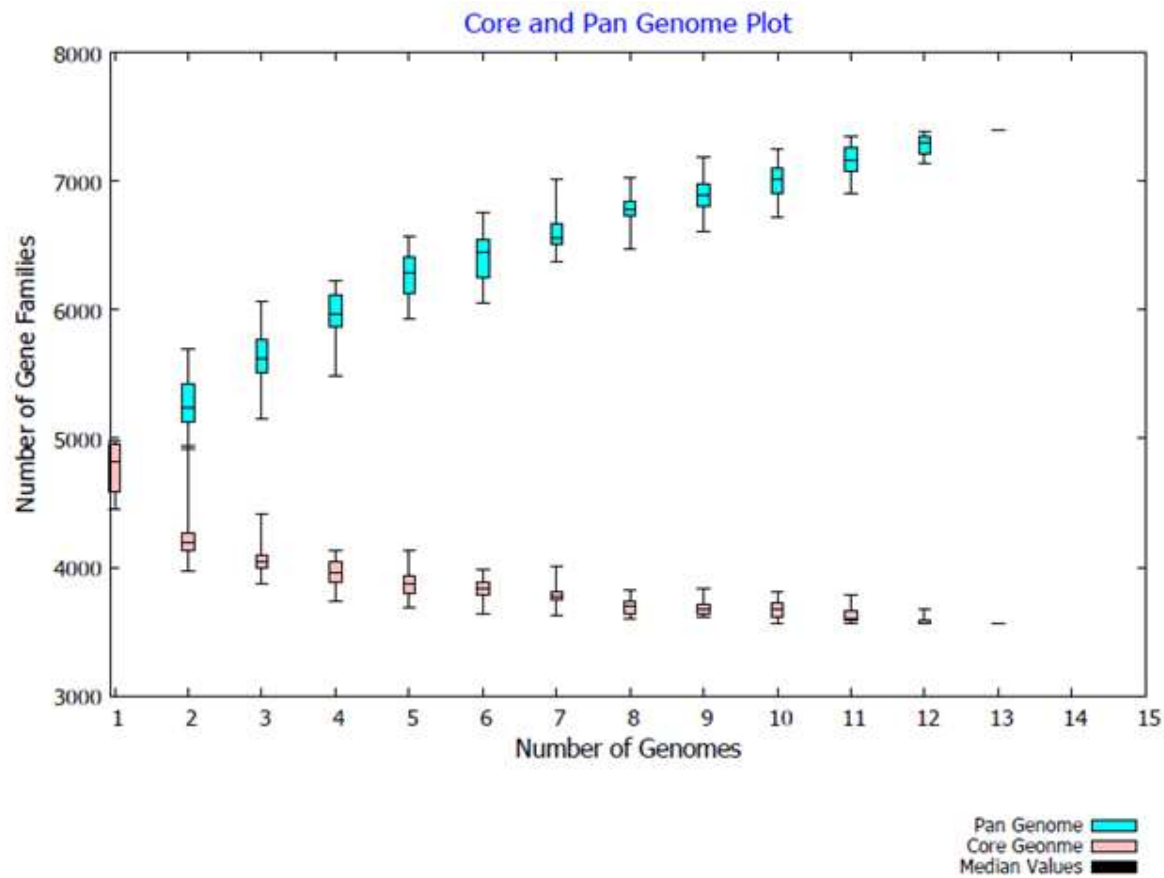



Supplementary Figure S5: GC% of *B. aryabhatai* strain AB211. GC% of individual genes are shown in blue line, whereas the red line indicate genomic GC% of *B. aryabhatai* strain AB211

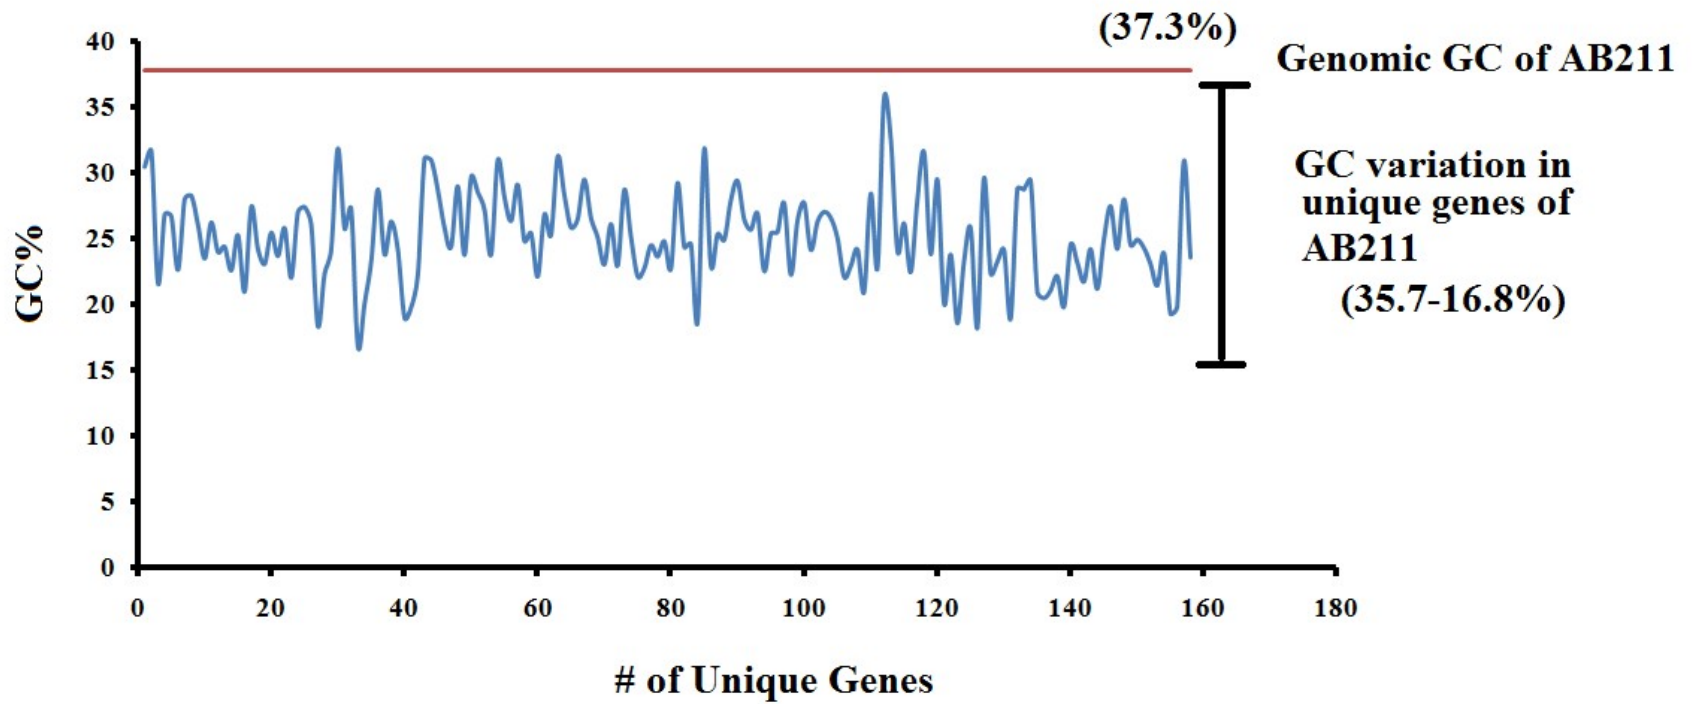



Supplementary Figure S6: (A) Landscape of metabolic versatility of *Bacillus aryabhatai* AB211. Qualitative characteristics: carbon source/ e<sup>-</sup> donor, antibiotics, heavy metals, phosphate solubilization, siderophore production, EPS synthesis, IAA production, motility and other biochemical characteristics as per Bergey's manual. (B) Biology assay for strain AB211. 71 carbon sources and 23 chemical utilization characteristics were examined in this study. Presence of a positive reaction was assigned with the colour green, and negative reaction was assigned a colour red.

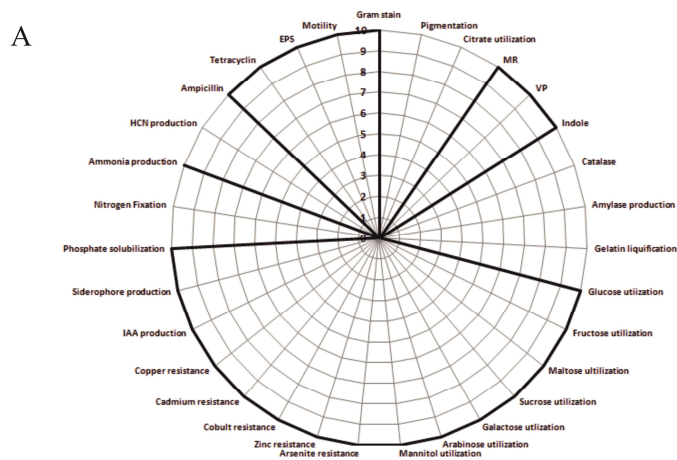

B

|                             |                      |                            |                            |                     |                        |                          |                          |                        |                   |                   |                     |
|-----------------------------|----------------------|----------------------------|----------------------------|---------------------|------------------------|--------------------------|--------------------------|------------------------|-------------------|-------------------|---------------------|
| Negative control            | Dextrin              | D-Maltose                  | D-Trehalose                | D-Cellobiose        | Gentiobiose            | Sucrose                  | D-Turanose               | Stachyose              | Positive Control  | pH 6              | pH 5                |
| D-Raffinose                 | o-D-Lactose          | D-Melibiose                | β-Methyl-D-Glucoside       | D-Salicin           | N-Acetyl-D-Glucosamine | N-Acetyl-β-D-Mannosamine | N-Acetyl-D-Galactosamine | N-Acetyl-Nouramic Acid | 1% NaCl           | 4% NaCl           | 8% NaCl             |
| o-D-Glucose                 | D-Mannose            | D-Fructose                 | D-Galactose                | 3-Methyl Glucose    | D-Fucose               | L-Fucose                 | L-Rhamnose               | Inosine                | 1% Sodium Lactate | Fusidic Acid      | D-Serine            |
| D-Sorbitol                  | D-Mannitol           | D-Arabinol                 | Myo-Inositol               | Glycerol            | D-Glucose-6-PO4        | D-Fructose-6-PO4         | D-Aspartic Acid          | D-Serine               | Trobandomycin     | Ridomycin SV      | Minocycline         |
| Gelatin                     | Glycyl-L-Proline     | L-Alanine                  | L-Arginine                 | L-Aspartic Acid     | L-Glutamic Acid        | L-Histidine              | L-Pyroglutamic Acid      | L-Serine               | Lincomycin        | Guanidine HCl     | Niaproof 4          |
| Fectin                      | D-Galacturonic Acid  | L-Galactonic Acid Lactone  | D-Gluconic Acid            | D-Gluconic Acid     | Glucuronamide          | Mucic Acid               | Quinic Acid              | D-Saccharic Acid       | Vancomycin        | Tetraolium Violet | Tetraolium Blue     |
| p-Hydroxy-Fluoroglucic acid | Methyl Pyruvate      | D-Lactic acid Methyl Ester | L-Lactic Acid              | Citric Acid         | o-Keto-Glutaric Acid   | D-Malic Acid             | L-Malic Acid             | Bromo-Succinic Acid    | Nalidixic Acid    | Lithium Chloride  | Potassium Tellurite |
| Tween-40                    | γ-Amino-Butyric Acid | o-Hydroxy-Butyric Acid     | β-Hydroxy-D,L-Butyric Acid | α-Keto-Butyric Acid | Acetoacetic Acid       | Propionic Acid           | Acetic Acid              | Formic Acid            | Aztreonam         | Sodium Butyrate   | Sodium Bromate      |

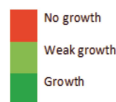

Supplementary Figure S7: (A) Siderophore production by *B. aryabhatai* AB211. (B) IAA production at different concentrations of tryptophan by strain AB211. (C) Plant growth promotion activity of strain AB211 using maize seedlings. (D) Motility of strain AB211.

**A**

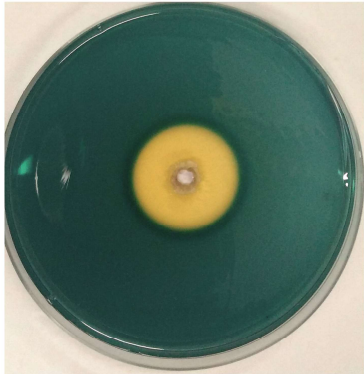

**B**

| L-tryptophan concentration ( $\mu\text{g/ml}$ ) | Amount of IAA produced ( $\mu\text{g/ml}$ ) |
|-------------------------------------------------|---------------------------------------------|
| Trp0                                            | $6.55 \pm 0.42$                             |
| Trp50                                           | $10.46 \pm 0.89$                            |
| Trp100                                          | $14.16 \pm 2.78$                            |
| Trp200                                          | $17.68333 \pm 3.7$                          |
| Trp400                                          | $33.7 \pm 4.62$                             |
| Trp500                                          | $43.98 \pm 9.45$                            |

**C**

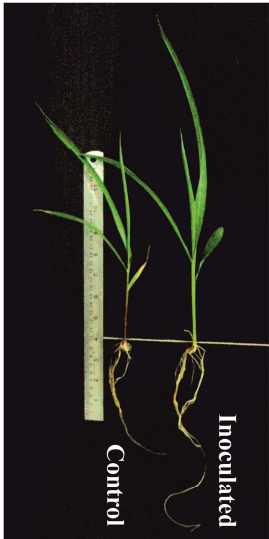

**D**

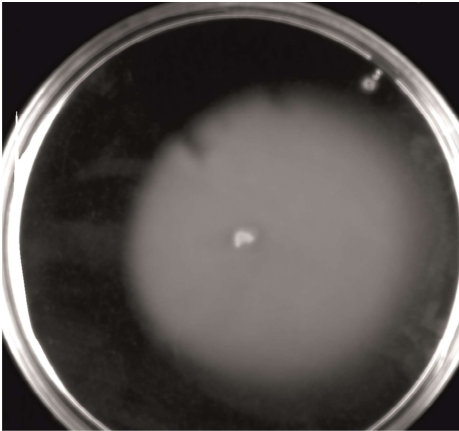

Supplementary Figure S8: Synthesis of IAA based on the annotation of the AB211 genome

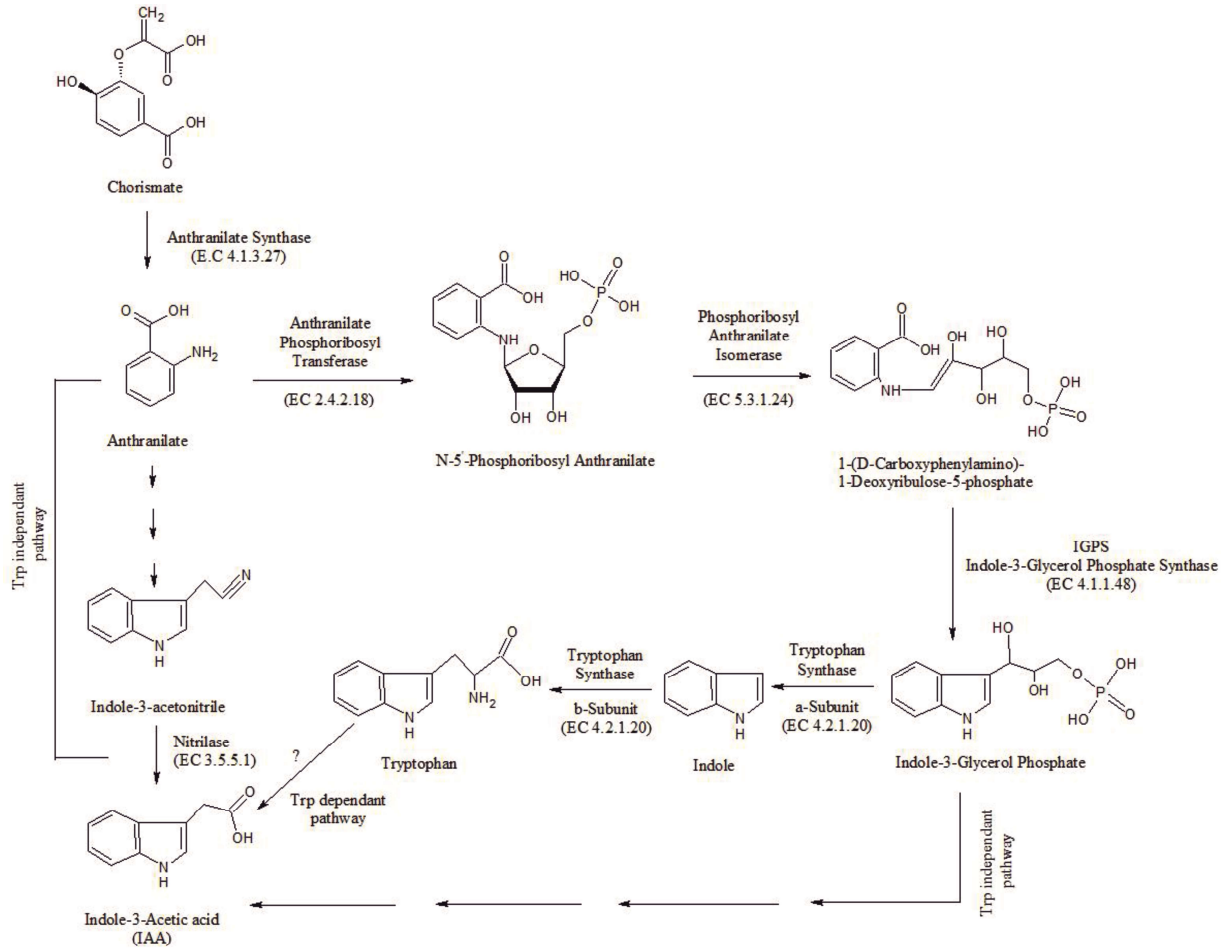

Supplementary Figure S9: Extent of *B. aryabhatai* AB211 cfu in rhizospheric soil mix on different sampling dates commencing from the date of AB211 application (day-0) as per the cfu estimations on selective NA (cumulative of cfu recorded on day-0, day-7, and day-15; vertical bars indicate standard deviation).

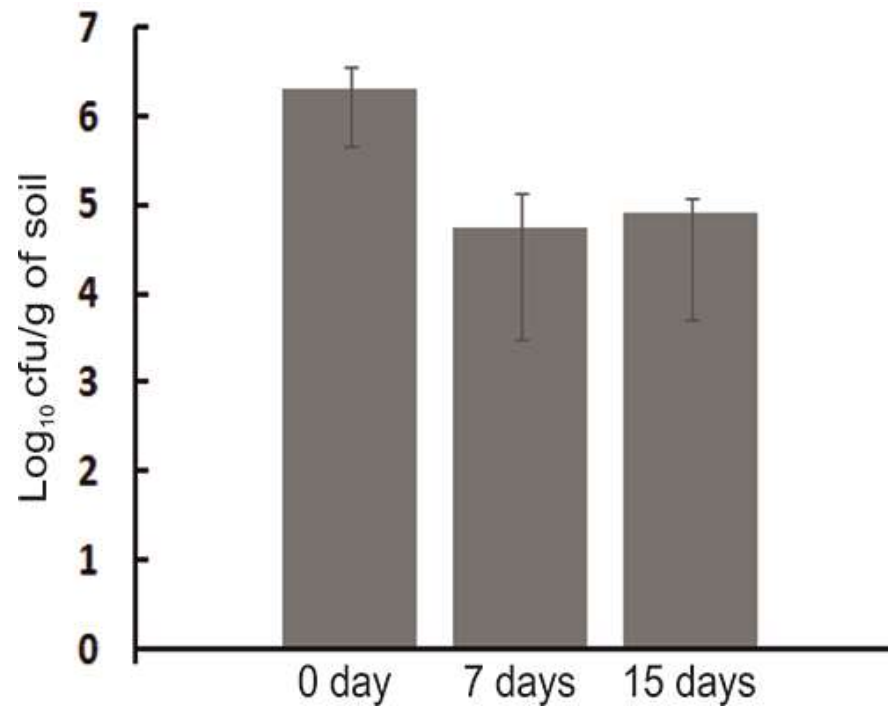

## Supplementary Tables

### Content

Supplementary Table S1: Metabolic diversity with respect to plant-microbe interaction of *B. aryabhatai* AB211

Supplementary Table S2: Average Nucleotide Identity (ANI) values during genomic comparison of *B. aryabhatai* strain AB211 with other homologous strains

Supplementary Table S3: Number of core, accessory, unique and exclusively absent genes as obtained from Pan-genome analysis of 13 strain of *B. aryabhatai* and *B. megaterium*.

Supplementary Table S4: Power and exponential fit law in BPGA pipeline to find out the estimated size of core genome and open/close nature of pan-genome

Supplementary Table S5: Exclusively present proteins of *Bacillus aryabhatai* AB211

Supplementary Table S6: COG category wise classification of 84 unique proteins of *B.aryabhatai* AB211

Supplementary Table S7: Motility and signaling genes in *B.aryabhatai* AB211

Supplementary Table S8: Stress response genes in *B.aryabhatai* AB211

Supplementary Table S9: Nitrogen metabolism genes in *B.aryabhatai* AB211

Supplementary Table S10: Siderophores and iron acquisition genes in *B.aryabhatai* AB211

Supplementary Table S11: Antibiotic and heavy metal resistance genes in *Bacillus aryabhatai* AB211

Supplementary Table S12: Aromatic compound degradation pathway genes in *B.aryabhatai* AB211

Supplementary Table S13: Carbohydrate metabolism in *B.aryabhatai* AB211

Supplementary Table S14: Phosphorous metabolism genes in *B.aryabhatai* AB211

Supplementary Table S15: Tryptophan/Auxin/Acetoin/2,3-butandiol biosynthesis genes in *B.aryabhatai* AB211

Table S1. Metabolic diversity with respect to plant-microbe interaction of *B. aryabhatai* AB211

| No. | Metabolic pathways                            | Number of genes |
|-----|-----------------------------------------------|-----------------|
| 1   | Carbohydrate metabolism                       | 300             |
| 2   | Flagella assembly, function and signaling     | 54              |
| 3   | Stress response                               | 74              |
| 4   | Nitrogen metabolism                           | 19              |
| 5   | Siderophore biosynthesis and iron acquisition | 29              |
| 6   | Antibiotic and heavy metal resistance         | 43              |
| 7   | Aromatic compound degradation                 | 16              |
| 8   | Phosphorous metabolism                        | 19              |
| 9   | Plant growth promoting hormones and volatiles | 17              |

Supplementary Table S2: Average Nucleotide Identity (ANI) values during genomic comparison of *B. aryabhatai* strain AB211 with other homologous strains

| Sl.No. | Strains                                    | <i>B. aryabhatai</i> AB211<br>ANI <sup>[1]</sup> |
|--------|--------------------------------------------|--------------------------------------------------|
| 1      | <i>B. aryabhatai</i> B8W22                 | 97.78                                            |
| 2      | <i>B. aryabhatai</i> C765                  | 95.21                                            |
| 3      | <i>B. aryabhatai</i> GZ03                  | 96.34                                            |
| 4      | <i>B. aryabhatai</i> LK20                  | 96.25                                            |
| 5      | <i>B. aryabhatai</i> LK25                  | 96.21                                            |
| 6      | <i>B. aryabhatai</i> M46                   | 96.31                                            |
| 7      | <i>B. aryabhatai</i> T61                   | 96.31                                            |
| 8      | <i>B. megaterium</i> Q3                    | 96.35                                            |
| 9      | <i>B. megaterium</i> QM B1551              | 95.47                                            |
| 10     | <i>B. megaterium</i> NBRC 15308 ATCC 14581 | 95.48                                            |
| 11     | <i>B. megaterium</i> DSM319                | 95.45                                            |
| 12     | <i>Bacillus megaterium</i> WSH-002         | 95.45                                            |

1. Rodriguez-R, Luis M., and Konstantinos T. Konstantinidis. "Bypassing cultivation to identify bacterial species." *Microbe* 9.3 (2014): 111-8.



Supplementary Table S3: Number of core, accessory, unique and exclusively absent genes as obtained from Pan-genome analysis of 13 strains of *B. aryabhatai* and *B. megaterium*.

| Sl. No. | Organism name                              | # core genes | # accessory genes | # unique genes | # exclusively absent genes |
|---------|--------------------------------------------|--------------|-------------------|----------------|----------------------------|
| 1       | <i>B. aryabhatai</i> AB211                 | 3558         | 1173              | 158            | 11                         |
| 2       | <i>B. aryabhatai</i> B8W22                 | 3558         | 866               | 130            | 104                        |
| 3       | <i>B. aryabhatai</i> C765                  | 3558         | 1188              | 232            | 10                         |
| 4       | <i>B. aryabhatai</i> GZ03                  | 3558         | 1117              | 80             | 5                          |
| 5       | <i>B. aryabhatai</i> LK20                  | 3558         | 1394              | 35             | 1                          |
| 6       | <i>B. aryabhatai</i> LK25                  | 3558         | 1391              | 2              | 1                          |
| 7       | <i>B. aryabhatai</i> M46                   | 3558         | 985               | 40             | 8                          |
| 8       | <i>B. aryabhatai</i> T61                   | 3558         | 1113              | 151            | 8                          |
| 9       | <i>B. megaterium</i> Q3                    | 3558         | 1159              | 249            | 9                          |
| 10      | <i>B. megaterium</i> QM B1551              | 3558         | 998               | 71             | 28                         |
| 11      | <i>B. megaterium</i> NBRC 15308 ATCC 14581 | 3558         | 1043              | 214            | 32                         |
| 12      | <i>B. megaterium</i> DSM319                | 3558         | 938               | 44             | 63                         |
| 13      | <i>B. megaterium</i> WSH-002               | 3558         | 798               | 92             | 114                        |

Supplementary Table S4: Power and exponential fit law in BPGA pipeline to find out the estimated size of core genome and open/close nature of pan-genome

|                | PAN GENOME   | CORE GENOME         |
|----------------|--------------|---------------------|
| Fit law        | POWER        | EXPONENTIAL         |
| Equation       | $f(x)=a.x^b$ | $fl(x)=c.e^{(d.x)}$ |
| Parameters     | a= 4688.9    | c= 4368.1           |
|                | b= 0.175829  | d= -0.0190245       |
| Expected Size  | 7392         | 0                   |
| Estimated Size | 7360.96      | 3411.01             |

The parameter 'b' = 0.175829 , The pan genome is still open but may be closed soon.

Supplementary Table S5: Exclusively present proteins of *Bacillus aryabhatai* AB211

| <b>Protein_ID</b> | <b>Description</b>                                      |
|-------------------|---------------------------------------------------------|
| WP_013081988.1    | MULTISPECIES: MFS transporter                           |
| WP_028412222.1    | MULTISPECIES: CoA transferase                           |
| WP_071271916.1    | hypothetical protein                                    |
| WP_071272047.1    | alpha/beta hydrolase                                    |
| WP_071272118.1    | aspartate racemase                                      |
| WP_071272227.1    | Phosphoribosyl-amino-imidazole carboxylase              |
| WP_071272272.1    | hypothetical protein                                    |
| WP_071273744.1    | hypothetical protein                                    |
| WP_071273749.1    | hypothetical protein                                    |
| WP_071273871.1    | hypothetical protein                                    |
| WP_071275060.1    | hypothetical protein                                    |
| WP_071275063.1    | hypothetical protein                                    |
| WP_071275066.1    | hypothetical protein                                    |
| WP_071275069.1    | hypothetical protein                                    |
| WP_071275072.1    | hypothetical protein                                    |
| WP_071275075.1    | hypothetical protein                                    |
| WP_071275078.1    | hypothetical protein                                    |
| WP_071275081.1    | hypothetical protein                                    |
| WP_071275084.1    | hypothetical protein                                    |
| WP_071275087.1    | hypothetical protein                                    |
| WP_071275090.1    | hypothetical protein                                    |
| WP_071275093.1    | hypothetical protein                                    |
| WP_071275096.1    | hypothetical protein                                    |
| WP_071275426.1    | hypothetical protein                                    |
| WP_071275428.1    | sigma-54-dependent Fis family transcriptional regulator |
| WP_071275430.1    | hypothetical protein                                    |

|                |                                       |
|----------------|---------------------------------------|
| WP_071275466.1 | hypothetical protein                  |
| WP_071275485.1 | hypothetical protein                  |
| WP_071275487.1 | hypothetical protein                  |
| WP_071275534.1 | nuclear export factor GLE1            |
| WP_071275536.1 | copper transporter                    |
| WP_071275556.1 | transcriptional regulator             |
| WP_071275599.1 | hypothetical protein                  |
| WP_071275949.1 | hypothetical protein                  |
| WP_071275954.1 | hypothetical protein                  |
| WP_071275958.1 | aspartate racemase                    |
| WP_071275960.1 | LysR family transcriptional regulator |
| WP_071276429.1 | hypothetical protein                  |
| WP_071276430.1 | hypothetical protein                  |
| WP_071276431.1 | hypothetical protein                  |
| WP_071276432.1 | hypothetical protein                  |
| WP_071276433.1 | hypothetical protein                  |
| WP_071276603.1 | AP endonuclease                       |
| WP_071276607.1 | hydroxymethylglutaryl-CoA lyase       |
| WP_071276609.1 | shikimate dehydrogenase               |
| WP_071277104.1 | hypothetical protein                  |
| WP_071277163.1 | hypothetical protein                  |
| WP_071277168.1 | hypothetical protein                  |
| WP_071277170.1 | hypothetical protein                  |
| WP_071277180.1 | transcriptional regulator             |
| WP_071277182.1 | PTS sorbitol transporter subunit IIA  |
| WP_071277184.1 | PTS sorbitol transporter subunit IIC  |
| WP_071277186.1 | transcriptional regulator             |
| WP_071277188.1 | NAD(P)-dependent oxidoreductase       |
| WP_071277190.1 | NUDIX hydrolase                       |

|                |                                               |
|----------------|-----------------------------------------------|
| WP_071277191.1 | hypothetical protein                          |
| WP_071277193.1 | hypothetical protein                          |
| WP_071277198.1 | hypothetical protein                          |
| WP_071277213.1 | hypothetical protein                          |
| WP_071277217.1 | hypothetical protein                          |
| WP_071277222.1 | MFS transporter                               |
| WP_071277225.1 | hypothetical protein                          |
| WP_071277226.1 | hypothetical protein                          |
| WP_071277227.1 | transcriptional regulator                     |
| WP_071277231.1 | hypothetical protein                          |
| WP_071277232.1 | nitrite reductase                             |
| WP_071277233.1 | MFS transporter                               |
| WP_071277234.1 | PTS beta-glucoside transporter subunit EIIBCA |
| WP_071277236.1 | hypothetical protein                          |
| WP_071277237.1 | transcription antiterminator BglG             |
| WP_071277238.1 | hypothetical protein                          |
| WP_071277239.1 | hypothetical protein                          |
| WP_071277241.1 | nitroreductase A                              |
| WP_071277246.1 | hypothetical protein                          |
| WP_071277251.1 | hypothetical protein                          |
| WP_071277252.1 | hypothetical protein                          |
| WP_071277253.1 | hypothetical protein                          |
| WP_071277254.1 | hypothetical protein                          |
| WP_071277255.1 | hypothetical protein                          |
| WP_071277256.1 | hypothetical protein                          |
| WP_071277257.1 | hypothetical protein                          |
| WP_071277258.1 | hypothetical protein                          |
| WP_071277259.1 | hypothetical protein                          |
| WP_071277280.1 | hypothetical protein                          |

|                |                                                                         |
|----------------|-------------------------------------------------------------------------|
| WP_071277293.1 | PTS sorbitol transporter subunit IIB                                    |
| WP_071277296.1 | hypothetical protein                                                    |
| WP_071277303.1 | hypothetical protein                                                    |
| WP_071277304.1 | DNA polymerase subunit beta                                             |
| WP_071277307.1 | hypothetical protein                                                    |
| WP_071277308.1 | hypothetical protein                                                    |
| WP_071277311.1 | antibiotic biosynthesis monooxygenase                                   |
| WP_071277312.1 | hypothetical protein                                                    |
| WP_071277320.1 | hypothetical protein                                                    |
| WP_071277322.1 | hypothetical protein                                                    |
| WP_071277323.1 | hypothetical protein                                                    |
| WP_071277324.1 | spore coat protein                                                      |
| WP_071277330.1 | pseudaminic acid synthase                                               |
| WP_071277331.1 | UDP-4-amino-4,6-dideoxy-N-acetyl-beta-L-altrosamine N-acetyltransferase |
| WP_071277332.1 | UDP-2,4-diacetamido-2,4,6-trideoxy-beta-L-altropyranose hydrolase       |
| WP_071277333.1 | gluconate 5-dehydrogenase                                               |
| WP_071277334.1 | oxidoreductase                                                          |
| WP_071277335.1 | spore coat protein                                                      |
| WP_071277336.1 | UDP-4-amino-4,6-dideoxy-N-acetyl-beta-L-altrosamine transaminase        |
| WP_071277337.1 | NAD-dependent dehydratase                                               |
| WP_071277338.1 | hypothetical protein                                                    |
| WP_071277339.1 | hypothetical protein                                                    |
| WP_071277342.1 | hypothetical protein                                                    |
| WP_071277343.1 | hypothetical protein                                                    |
| WP_071277347.1 | glucose-1-phosphate thymidyltransferase                                 |
| WP_071277349.1 | hypothetical protein                                                    |
| WP_071277350.1 | hypothetical protein                                                    |
| WP_071277351.1 | hypothetical protein                                                    |
| WP_071277353.1 | hypothetical protein                                                    |

|                |                                                 |
|----------------|-------------------------------------------------|
| WP_071277368.1 | hypothetical protein                            |
| WP_071277372.1 | UDP-glucose 4-epimerase                         |
| WP_071277373.1 | glycosyl transferase                            |
| WP_071277374.1 | hypothetical protein                            |
| WP_071277377.1 | hypothetical protein                            |
| WP_071277378.1 | hypothetical protein                            |
| WP_071277382.1 | hypothetical protein                            |
| WP_071277383.1 | hypothetical protein                            |
| WP_071277384.1 | hypothetical protein                            |
| WP_071277385.1 | hypothetical protein                            |
| WP_071277386.1 | hypothetical protein                            |
| WP_071277387.1 | hypothetical protein                            |
| WP_071277389.1 | peptidase S8                                    |
| WP_071277391.1 | hypothetical protein                            |
| WP_071277395.1 | hypothetical protein                            |
| WP_071277399.1 | hypothetical protein                            |
| WP_071277400.1 | hypothetical protein                            |
| WP_071277401.1 | hypothetical protein                            |
| WP_071277406.1 | hypothetical protein                            |
| WP_071277407.1 | hypothetical protein                            |
| WP_071277408.1 | hypothetical protein                            |
| WP_071277409.1 | 2,4-diacetylphloroglucinol biosynthesis protein |
| WP_071277410.1 | hypothetical protein                            |
| WP_071277411.1 | hypothetical protein                            |
| WP_071277412.1 | hypothetical protein                            |
| WP_071277413.1 | hypothetical protein                            |
| WP_071277414.1 | hypothetical protein                            |
| WP_071277415.1 | hypothetical protein                            |
| WP_071277421.1 | hypothetical protein                            |



|                |                                       |
|----------------|---------------------------------------|
| WP_071277423.1 | hypothetical protein                  |
| WP_071277431.1 | hypothetical protein                  |
| WP_071277437.1 | TetR family transcriptional regulator |
| WP_071277440.1 | hypothetical protein                  |
| WP_071277444.1 | hypothetical protein                  |
| WP_071277446.1 | hypothetical protein                  |
| WP_071277448.1 | hypothetical protein                  |
| WP_071277450.1 | hypothetical protein                  |
| WP_071277454.1 | hypothetical protein                  |
| WP_071277456.1 | recombinase                           |
| WP_071277458.1 | hypothetical protein                  |
| WP_071277462.1 | hypothetical protein                  |
| WP_071277464.1 | hypothetical protein                  |
| WP_071277466.1 | hypothetical protein                  |
| WP_071277468.1 | hypothetical protein                  |
| WP_071277470.1 | hypothetical protein                  |
| WP_071277472.1 | hypothetical protein                  |
| WP_071277478.1 | hypothetical protein                  |

Table S6. COG category wise classification of 84 unique proteins of *B. aryabhattai* AB211\*

| COGs | Description                                                   | Number (Category) | %     | Category                           |
|------|---------------------------------------------------------------|-------------------|-------|------------------------------------|
| J    | Translation, ribosomal structure and biogenesis               | 1                 | 1.05  | Information storage and processing |
| K    | Transcription                                                 | 8                 | 8.42  |                                    |
| L    | Replication, recombination and repair                         | 2                 | 2.11  |                                    |
| D    | Cell cycle control, cell division, chromosome partitioning    | 0                 | 0.00  | Cellular processes and signaling   |
| V    | Defense mechanisms                                            | 4                 | 4.21  |                                    |
| T    | Signal transduction mechanisms                                | 4                 | 4.21  |                                    |
| M    | Cell wall/membrane/envelope biogenesis                        | 18                | 18.95 |                                    |
| N    | Cell motility                                                 | 0                 | 0.00  |                                    |
| U    | Intracellular trafficking, secretion, and vesicular transport | 2                 | 2.11  |                                    |
| O    | Posttranslational modification, protein turnover, chaperones  | 1                 | 1.05  |                                    |
| C    | Energy production and conversion                              | 2                 | 2.11  | Metabolism                         |
| G    | Carbohydrate transport and metabolism                         | 13                | 13.68 |                                    |
| E    | Amino acid transport and metabolism                           | 7                 | 7.37  |                                    |
| F    | Nucleotide transport and metabolism                           | 1                 | 1.05  |                                    |
| H    | Coenzyme transport and metabolism                             | 1                 | 1.05  |                                    |
| I    | Lipid transport and metabolism                                | 4                 | 4.21  |                                    |
| P    | Inorganic ion transport and metabolism                        | 2                 | 2.11  |                                    |
| Q    | Secondary metabolites biosynthesis, transport and catabolism  | 3                 | 3.16  |                                    |
| R    | General function prediction only                              | 11                | 11.58 | Poorly characterized               |
| S    | Function unknown                                              | 11                | 11.58 |                                    |

\* Although total COG Number is 84 but total COG category number is 95, as multi-category COGs are counted multiple times.

Table S7. Motility and signaling genes in *B.aryabhatai* AB211

| No | Contig_id/Size/start-end                                                        | Subcategory                              | Subsystem                  | Function (EC No.)                                                                         |
|----|---------------------------------------------------------------------------------|------------------------------------------|----------------------------|-------------------------------------------------------------------------------------------|
| 1  | scaffold11 size4199117_700953_701954                                            | Motility and Chemotaxis - no subcategory | Bacterial Chemotaxis       | Flagellar motor switch protein FliM                                                       |
| 2  | scaffold11 size4199117_3478388_3477483                                          | Motility and Chemotaxis - no subcategory | Bacterial Chemotaxis       | Chemotaxis protein CheV (EC 2.7.3.-)                                                      |
| 3  | scaffold11 size4199117_714072_714500                                            | Motility and Chemotaxis - no subcategory | Bacterial Chemotaxis       | Positive regulator of CheA protein activity (CheW)                                        |
| 4  | scaffold11 size4199117_701944_703074                                            | Motility and Chemotaxis - no subcategory | Bacterial Chemotaxis       | Flagellar motor switch protein FliN                                                       |
| 5  | scaffold11 size4199117_712062_714041                                            | Motility and Chemotaxis - no subcategory | Bacterial Chemotaxis       | Signal transduction histidine kinase CheA (EC 2.7.3.-)                                    |
| 6  | scaffold11 size4199117_2312476_2311190                                          | Motility and Chemotaxis - no subcategory | Bacterial Chemotaxis       | Maltose/maltodextrin ABC transporter, substrate binding periplasmic protein MalE          |
| 7  | scaffold11 size4199117_692182_693201                                            | Motility and Chemotaxis - no subcategory | Bacterial Chemotaxis       | Flagellar motor switch protein FliG                                                       |
| 8  | scaffold11 size4199117_711004_712047                                            | Motility and Chemotaxis - no subcategory | Bacterial Chemotaxis       | Chemotaxis response regulator protein-glutamate methyltransferase CheB (EC 3.1.1.61)      |
| 9  | scaffold11 size4199117_554970_555752;<br>scaffold11 size4199117_2425822_2429382 | Motility and Chemotaxis - no subcategory | Bacterial Chemotaxis       | Chemotaxis protein methyltransferase CheR (EC 2.1.1.80)                                   |
| 10 | scaffold11 size4199117_714551_715045                                            | Motility and Chemotaxis - no subcategory | Bacterial Chemotaxis       | Chemotaxis protein CheD                                                                   |
| 11 | scaffold11 size4199117_703096_703458                                            | Motility and Chemotaxis - no subcategory | Bacterial Chemotaxis       | Chemotaxis regulator - transmits chemoreceptor signals to flagellar motor components CheY |
| 12 | scaffold11 size4199117_689776_690225                                            | Flagellar motility in Prokaryota         | Flagellum in Campylobacter | Flagellar basal-body rod protein FlgC                                                     |
| 13 | scaffold11 size4199117_3701896_3702624                                          | Flagellar motility in Prokaryota         | Flagellum in Campylobacter | Flagellin protein FlaA                                                                    |
| 14 | Scaffold8 size138119_10229_12400                                                | Flagellar motility in Prokaryota         | Flagellum in Campylobacter | Cell division protein FtsI [Peptidoglycan synthetase] (EC 2.4.1.129)                      |
| 15 | scaffold11 size4199117_690238_690528                                            | Flagellar motility in Prokaryota         | Flagellum in Campylobacter | Flagellar hook-basal body complex protein FliE                                            |

|    |                                      |                                  |                            |                                                    |
|----|--------------------------------------|----------------------------------|----------------------------|----------------------------------------------------|
| 16 | scaffold11 size4199117_689384_689773 | Flagellar motility in Prokaryota | Flagellum in Campylobacter | Flagellar basal-body rod protein FlgB              |
| 17 | scaffold11 size4199117_710125_710994 | Flagellar motility in Prokaryota | Flagellum                  | Flagellar synthesis regulator FleN                 |
| 18 | scaffold11 size4199117_360549_361682 | Flagellar motility in Prokaryota | Flagellum                  | RNA polymerase sigma factor RpoD                   |
| 19 | scaffold11 size4199117_700501_700932 | Flagellar motility in Prokaryota | Flagellum                  | Flagellar biosynthesis protein FliL                |
| 20 | Scaffold10 size375231_171775_169955  | Flagellar motility in Prokaryota | Flagellum                  | Flagellar hook-associated protein FliD             |
| 21 | Scaffold10 size375231_183747_182236  | Flagellar motility in Prokaryota | Flagellum                  | Flagellar hook-associated protein FlgK             |
| 22 | scaffold11 size4199117_693194_693982 | Flagellar motility in Prokaryota | Flagellum                  | Flagellar assembly protein FliH                    |
| 23 | scaffold11 size4199117_705227_705883 | Flagellar motility in Prokaryota | Flagellum                  | Flagellar biosynthesis protein FliR                |
| 24 | scaffold11 size4199117_704156_704824 | Flagellar motility in Prokaryota | Flagellum                  | Flagellar biosynthesis protein FliP                |
| 25 | scaffold11 size4199117_699458_700252 | Flagellar motility in Prokaryota | Flagellum                  | Flagellar hook protein FlgE                        |
| 26 | scaffold11 size4199117_690578_692170 | Flagellar motility in Prokaryota | Flagellum                  | Flagellar M-ring protein FliF                      |
| 27 | scaffold11 size4199117_699004_699432 | Flagellar motility in Prokaryota | Flagellum                  | Flagellar basal-body rod modification protein FlgD |
| 28 | scaffold11 size4199117_689776_690225 | Flagellar motility in Prokaryota | Flagellum                  | Flagellar basal-body rod protein FlgC              |
| 29 | Scaffold10 size375231_184503_184249  | Flagellar motility in Prokaryota | Flagellum                  | Negative regulator of flagellin synthesis          |
| 30 | scaffold11 size4199117_705886_706968 | Flagellar motility in Prokaryota | Flagellum                  | Flagellar biosynthesis protein FlhB                |
| 31 | scaffold11 size4199117_690238_690528 | Flagellar motility in Prokaryota | Flagellum                  | Flagellar hook-basal body complex protein FliE     |
| 32 | scaffold11 size4199117_689384_689773 | Flagellar motility in Prokaryota | Flagellum                  | Flagellar basal-body rod protein FlgB              |
| 33 | scaffold11 size4199117_703522_704163 | Flagellar motility in Prokaryota | Flagellum                  | Flagellar biosynthesis protein FliZ                |
| 34 | Scaffold10 size375231_169938_169537; | Flagellar motility in Prokaryota | Flagellum                  | Flagellar biosynthesis protein FliS                |

|    |                                                                                 |                                  |           |                                            |
|----|---------------------------------------------------------------------------------|----------------------------------|-----------|--------------------------------------------|
|    | Scaffold10 size375231_189359_188925                                             |                                  |           |                                            |
| 35 | Scaffold10 size375231_211288_210464                                             | Flagellar motility in Prokaryota | Flagellum | Flagellar basal-body rod protein FlgF      |
| 36 | scaffold11 size4199117_3701896_3702624                                          | Flagellar motility in Prokaryota | Flagellum | Flagellin protein FlaA                     |
| 37 | scaffold11 size4199117_701944_703074                                            | Flagellar motility in Prokaryota | Flagellum | Flagellar motor switch protein FliN        |
| 38 | scaffold11 size4199117_695726_696358                                            | Flagellar motility in Prokaryota | Flagellum | Flagellar protein FlbB                     |
| 39 | Scaffold10 size375231_210440_209619                                             | Flagellar motility in Prokaryota | Flagellum | Flagellar basal-body rod protein FlgG      |
| 40 | Scaffold10 size375231_124523_123213;<br>scaffold11 size4199117_3908800_3910134  | Flagellar motility in Prokaryota | Flagellum | RNA polymerase sigma-54 factor RpoN        |
| 41 | scaffold11 size4199117_84890_85501;<br>scaffold11 size4199117_2710660_2709827   | Flagellar motility in Prokaryota | Flagellum | Flagellar motor rotation protein MotB      |
| 42 | scaffold11 size4199117_695303_695716                                            | Flagellar motility in Prokaryota | Flagellum | Flagellar protein FliJ                     |
| 43 | Scaffold10 size375231_182233_181352                                             | Flagellar motility in Prokaryota | Flagellum | Flagellar hook-associated protein FlgL     |
| 44 | scaffold11 size4199117_706999_709035                                            | Flagellar motility in Prokaryota | Flagellum | Flagellar biosynthesis protein FlhA        |
| 45 | scaffold11 size4199117_693957_695270                                            | Flagellar motility in Prokaryota | Flagellum | Flagellum-specific ATP synthase FliI       |
| 46 | scaffold11 size4199117_704835_705104                                            | Flagellar motility in Prokaryota | Flagellum | Flagellar biosynthesis protein FliQ        |
| 47 | scaffold11 size4199117_696376_698994;<br>scaffold11 size4199117_3611015_3609321 | Flagellar motility in Prokaryota | Flagellum | Flagellar hook-length control protein FliK |
| 48 | scaffold11 size4199117_700953_701954                                            | Flagellar motility in Prokaryota | Flagellum | Flagellar motor switch protein FliM        |
| 49 | scaffold11 size4199117_709035_710132                                            | Flagellar motility in Prokaryota | Flagellum | Flagellar biosynthesis protein FlhF        |

|    |                                                                               |                                  |           |                                                  |
|----|-------------------------------------------------------------------------------|----------------------------------|-----------|--------------------------------------------------|
| 50 | scaffold11 size4199117_84052_84855;<br>scaffold11 size4199117_2711447_2710653 | Flagellar motility in Prokaryota | Flagellum | Flagellar motor rotation protein MotA            |
| 51 | scaffold11 size4199117_692182_693201                                          | Flagellar motility in Prokaryota | Flagellum | Flagellar motor switch protein FliG              |
| 52 | scaffold11 size4199117_700288_700497                                          | Flagellar motility in Prokaryota | Flagellum | Flagellar protein FliD                           |
| 53 | scaffold11 size4199117_715102_715863                                          | Flagellar motility in Prokaryota | Flagellum | RNA polymerase sigma factor for flagellar operon |
| 54 | Scaffold8 size138119_70287_69856;<br>scaffold11 size4199117_1568244_1567765   | Flagellar motility in Prokaryota | Flagellum | Rrf2 family transcriptional regulator            |

Table S8. Stress response genes in *B. aryabhatai* AB211

| No. | Contig_id/Size/start-end                                                                                                | Subcategory      | Subsystem                                           | Function (EC No.)                                                                             |
|-----|-------------------------------------------------------------------------------------------------------------------------|------------------|-----------------------------------------------------|-----------------------------------------------------------------------------------------------|
| 1   | Scaffold8 size138119_79808_78981                                                                                        | Osmotic stress   | Osmoregulation                                      | Glycerol uptake facilitator protein                                                           |
| 2   | scaffold11 size4199117_3246007_3245126                                                                                  | Osmotic stress   | Choline and Betaine Uptake and Betaine Biosynthesis | Glycine betaine ABC transport system, permease/glycine betaine-binding protein OpuABC         |
| 3   | scaffold11 size4199117_3256625_3256939;<br>scaffold11 size4199117_3257042_3257185;<br>scaffold12 size137365_43435_43995 | Osmotic stress   | Choline and Betaine Uptake and Betaine Biosynthesis | Choline binding protein A                                                                     |
| 4   | Scaffold10 size375231_178568_179770                                                                                     | Osmotic stress   | Choline and Betaine Uptake and Betaine Biosynthesis | Alcohol dehydrogenase GbsB (type III ), essential for the utilization of choline (EC 1.1.1.1) |
| 5   | scaffold11 size4199117_959557_960507;<br>scaffold11 size4199117_3248148_3246895                                         | Osmotic stress   | Choline and Betaine Uptake and Betaine Biosynthesis | Glycine betaine ABC transport system, ATP-binding protein OpuAA (EC 3.6.3.32)                 |
| 6   | scaffold11 size4199117_2324781_2323252                                                                                  | Osmotic stress   | Choline and Betaine Uptake and Betaine Biosynthesis | Choline-sulfatase (EC 3.1.6.6)                                                                |
| 7   | Scaffold10 size375231_177062_178546;<br>scaffold11 size4199117_3943342_3941855                                          | Osmotic stress   | Choline and Betaine Uptake and Betaine Biosynthesis | Betaine aldehyde dehydrogenase (EC 1.2.1.8)                                                   |
| 8   | scaffold11 size4199117_3442398_3443918                                                                                  | Osmotic stress   | Choline and Betaine Uptake and Betaine Biosynthesis | Glycine betaine transporter OpuD                                                              |
| 9   | scaffold11 size4199117_960507_962030                                                                                    | Osmotic stress   | Choline and Betaine Uptake and Betaine Biosynthesis | L-proline glycine betaine binding ABC transporter protein ProX (TC 3.A.1.12.1)                |
| 10  | scaffold11 size4199117_3944308_3944748                                                                                  | Osmotic stress   | Choline and Betaine Uptake and Betaine Biosynthesis | Glycine betaine ABC transport system, permease protein OpuAB                                  |
| 11  | scaffold11 size4199117_3246892_3246029                                                                                  | Osmotic stress   | Choline and Betaine Uptake and Betaine Biosynthesis | L-proline glycine betaine ABC transport system permease protein ProW (TC 3.A.1.12.1)          |
| 12  | scaffold11 size4199117_379142_379750                                                                                    | Oxidative stress | Protection from Reactive Oxygen Species             | Manganese superoxide dismutase (EC 1.15.1.1)                                                  |



|    |                                                                                                                         |                  |                                         |                                                                                                  |
|----|-------------------------------------------------------------------------------------------------------------------------|------------------|-----------------------------------------|--------------------------------------------------------------------------------------------------|
| 13 | Scaffold10 size375231_26915_26391;<br>scaffold11 size4199117_2595477_2594887                                            | Oxidative stress | Protection from Reactive Oxygen Species | Superoxide dismutase [Cu-Zn] precursor (EC 1.15.1.1)                                             |
| 14 | scaffold11 size4199117_2002990_2003874                                                                                  | Oxidative stress | Protection from Reactive Oxygen Species | Superoxide dismutase [Fe] (EC 1.15.1.1)                                                          |
| 15 | Scaffold10 size375231_317129_318589;<br>scaffold11 size4199117_949496_947454;<br>scaffold11 size4199117_1723636_1721942 | Oxidative stress | Protection from Reactive Oxygen Species | Catalase (EC 1.11.1.6)                                                                           |
| 16 | scaffold11 size4199117_30945_31385;<br>scaffold11 size4199117_1748746_1748294                                           | Oxidative stress | Oxidative stress                        | Iron-binding ferritin-like antioxidant protein                                                   |
| 17 | scaffold11 size4199117_2436893_2437342                                                                                  | Oxidative stress | Oxidative stress                        | Organic hydroperoxide resistance transcriptional regulator                                       |
| 18 | scaffold11 size4199117_3461814_3461266;<br>scaffold11 size4199117_3814712_3814170                                       | Oxidative stress | Oxidative stress                        | Alkyl hydroperoxidoreductase subunit C-like protein                                              |
| 19 | scaffold11 size4199117_372124_372537                                                                                    | Oxidative stress | Oxidative stress                        | Zinc uptake regulation protein ZUR                                                               |
| 20 | scaffold11 size4199117_30945_31385;<br>scaffold11 size4199117_1748746_1748294                                           | Oxidative stress | Oxidative stress                        | Non-specific DNA-binding protein Dps                                                             |
| 21 | Scaffold3 size19195_5953_6591                                                                                           | Oxidative stress | Oxidative stress                        | Redox-sensitive transcriptional regulator (AT-rich DNA-binding protein)                          |
| 22 | Scaffold9 size151310_2307_1873                                                                                          | Oxidative stress | Oxidative stress                        | Peroxide stress regulator PerR, FUR family                                                       |
| 23 | scaffold11 size4199117_491299_491751                                                                                    | Oxidative stress | Oxidative stress                        | Ferric uptake regulation protein FUR                                                             |
| 24 | Scaffold9 size151310_51017_51466                                                                                        | Oxidative stress | Oxidative stress                        | Nitrite-sensitive transcriptional repressor NsrR                                                 |
| 25 | scaffold11 size4199117_4146135_4146833                                                                                  | Oxidative stress | Oxidative stress                        | transcriptional regulator, Crp/Fnr family                                                        |
| 26 | Scaffold9 size151310_94119_93700;<br>scaffold11 size4199117_2437824_2437405                                             | Oxidative stress | Oxidative stress                        | Organic hydroperoxide resistance protein                                                         |
| 27 | scaffold11 size4199117_3033077_3032652                                                                                  | Oxidative stress | Glutathione: Non-redox reactions        | Lactoylglutathionelyase (EC 4.4.1.5)                                                             |
| 28 | scaffold11 size4199117_397164_397796                                                                                    | Oxidative stress | Glutathione: Non-redox reactions        | Similar to Hydroxyacylglutathione hydrolase, but in an organism lacking glutathione biosynthesis |

|    |                                                                                                                                                                                                                                                                                                                                                     |                  |                                                 |                                                                                                         |
|----|-----------------------------------------------------------------------------------------------------------------------------------------------------------------------------------------------------------------------------------------------------------------------------------------------------------------------------------------------------|------------------|-------------------------------------------------|---------------------------------------------------------------------------------------------------------|
| 29 | scaffold11 size4199117_480806_481762                                                                                                                                                                                                                                                                                                                | Oxidative stress | Glutathione: Non-redox reactions                | Hydroxyacylglutathione hydrolase (EC 3.1.2.6)                                                           |
| 30 | scaffold11 size4199117_2530326_2528857;<br>scaffold11 size4199117_3556461_3554941                                                                                                                                                                                                                                                                   | Oxidative stress | Redox-dependent regulation of nucleus processes | Nicotinatephosphoribosyltransferase (EC 2.4.2.11)                                                       |
| 31 | scaffold11 size4199117_145946_146977                                                                                                                                                                                                                                                                                                                | Oxidative stress | Redox-dependent regulation of nucleus processes | NADPH-dependent glyceraldehyde-3-phosphate dehydrogenase (EC 1.2.1.13)                                  |
| 32 | Scaffold2 size15766_4636_5178;<br>scaffold11 size4199117_2530898_2530350                                                                                                                                                                                                                                                                            | Oxidative stress | Redox-dependent regulation of nucleus processes | Nicotinamidase (EC 3.5.1.19)                                                                            |
| 33 | scaffold11 size4199117_900664_901383                                                                                                                                                                                                                                                                                                                | Oxidative stress | Redox-dependent regulation of nucleus processes | NAD-dependent protein deacetylase of SIR2 family                                                        |
| 34 | Scaffold10 size375231_121743_120736                                                                                                                                                                                                                                                                                                                 | Oxidative stress | Redox-dependent regulation of nucleus processes | NAD-dependent glyceraldehyde-3-phosphate dehydrogenase (EC 1.2.1.12)                                    |
| 35 | Scaffold8 size138119_57254_57874;<br>Scaffold9 size151310_50800_49619;<br>scaffold11 size4199117_2920628_2919408                                                                                                                                                                                                                                    | Oxidative stress | Glutaredoxins                                   | Flavoheмоprotein (Hemoglobin-like protein) (Flavoheмоglobin) (Nitric oxide dioxygenase) (EC 1.14.12.17) |
| 36 | Scaffold10 size375231_53739_54740                                                                                                                                                                                                                                                                                                                   | Oxidative stress | Glutaredoxins                                   | Cell wall endopeptidase, family M23/M37                                                                 |
| 37 | scaffold11 size4199117_1716714_1717973                                                                                                                                                                                                                                                                                                              | Oxidative stress | Glutathionylspermidine and Trypanothione        | Similarity with glutathionylspermidine synthase (EC 6.3.1.8), group 2                                   |
| 38 | scaffold11 size4199117_1593488_1593685;<br>scaffold11 size4199117_3335212_3335415;<br>scaffold11 size4199117_3376983_3376780;<br>scaffold11 size4199117_3817415_3817612                                                                                                                                                                             | Cold shock       | Cold shock, CspA family of proteins             | Cold shock protein CspD                                                                                 |
| 39 | scaffold11 size4199117_1061505_1061705;<br>scaffold11 size4199117_1236763_1236963;<br>scaffold11 size4199117_1433933_1434136;<br>scaffold11 size4199117_1435007_1434807;<br>scaffold11 size4199117_2014664_2014464;<br>scaffold11 size4199117_2019057_2018857;<br>scaffold11 size4199117_3078844_3079044;<br>scaffold11 size4199117_3081492_3081289 | Cold shock       | Cold shock, CspA family of proteins             | Cold shock protein CspA                                                                                 |
| 40 | scaffold11 size4199117_1360036_1359824                                                                                                                                                                                                                                                                                                              | Cold shock       | Cold shock, CspA family of proteins             | Cold shock protein CspE                                                                                 |
| 41 | scaffold11 size4199117_334939_336078                                                                                                                                                                                                                                                                                                                | Heat shock       | Heat shock dnaK gene cluster                    | Hypothetical radical SAM                                                                                |

|    |                                      |            |                                       |                                                                                                    |
|----|--------------------------------------|------------|---------------------------------------|----------------------------------------------------------------------------------------------------|
|    |                                      |            | extended                              | family enzyme in heat shock gene cluster, similarity with CPO of BS HemN-type                      |
| 42 | scaffold11 size4199117_336170_337198 | Heat shock | Heat shock dnaK gene cluster extended | Heat-inducible transcription repressor HrcA                                                        |
| 43 | scaffold11 size4199117_337895_339712 | Heat shock | Heat shock dnaK gene cluster extended | Chaperone protein DnaK                                                                             |
| 44 | scaffold11 size4199117_342915_344273 | Heat shock | Heat shock dnaK gene cluster extended | tRNA-t(6)A37 methyltransferase                                                                     |
| 45 | scaffold11 size4199117_339948_341078 | Heat shock | Heat shock dnaK gene cluster extended | Chaperone protein DnaJ                                                                             |
| 46 | scaffold11 size4199117_342157_342909 | Heat shock | Heat shock dnaK gene cluster extended | Ribosomal RNA small subunit methyltransferase E (EC 2.1.1.-)                                       |
| 47 | Scaffold10 size375231_111476_111009  | Heat shock | Heat shock dnaK gene cluster extended | tmRNA-binding protein SmpB                                                                         |
| 48 | scaffold11 size4199117_337304_337864 | Heat shock | Heat shock dnaK gene cluster extended | Heat shock protein GrpE                                                                            |
| 49 | Scaffold6 size49359_44506_44141      | Heat shock | Heat shock dnaK gene cluster extended | DNA replication initiation control protein YabA                                                    |
| 50 | scaffold11 size4199117_332940_334763 | Heat shock | Heat shock dnaK gene cluster extended | Translation elongation factor LepA                                                                 |
| 51 | Scaffold6 size49359_19973_19707      | Heat shock | Heat shock dnaK gene cluster extended | Ribosome-associated heat shock protein implicated in the recycling of the 50S subunit (S4 paralog) |
| 52 | scaffold11 size4199117_202305_202898 | Heat shock | Heat shock dnaK gene cluster extended | Nucleoside 5-triphosphatase RdgB (dHATP, dITP, XTP-specific) (EC 3.6.1.15)                         |
| 53 | scaffold11 size4199117_341196_342137 | Heat shock | Heat shock dnaK gene cluster extended | Ribosomal protein L11 methyltransferase (EC 2.1.1.-)                                               |
| 54 | Scaffold6 size49359_45348_44521      | Heat shock | Heat shock dnaK gene cluster extended | Signal peptidase-like protein                                                                      |
| 55 | scaffold11 size4199117_202914_203426 | Heat shock | Heat shock dnaK gene cluster extended | FIG009886: phosphoesterase                                                                         |
| 56 | scaffold11 size4199117_201549_202295 | Heat shock | Heat shock dnaK gene cluster extended | Ribonuclease PH (EC 2.7.7.56)                                                                      |
| 57 | Scaffold6 size49359_43064_42192      | Heat shock | Heat shock dnaK gene cluster          | rRNA small subunit                                                                                 |

|    |                                                                                                                                                                                                                                                                                                          |                                  |                                   |                                                                                   |
|----|----------------------------------------------------------------------------------------------------------------------------------------------------------------------------------------------------------------------------------------------------------------------------------------------------------|----------------------------------|-----------------------------------|-----------------------------------------------------------------------------------|
|    |                                                                                                                                                                                                                                                                                                          |                                  | extended                          | methyltransferase I                                                               |
| 58 | scaffold11 size4199117_2606026_2604953                                                                                                                                                                                                                                                                   | Detoxification                   | Uptake of selenate and selenite   | Sulfate and thiosulfate import ATP-binding protein CysA (EC 3.6.3.25)             |
| 59 | Scaffold10 size375231_79735_78686                                                                                                                                                                                                                                                                        | Stress Response - no subcategory | Flavo-haemoglobin                 | ABC-type Fe <sup>3+</sup> -siderophore transport system, permease 2 component     |
| 60 | Scaffold5 size51851_8309_7953                                                                                                                                                                                                                                                                            | Stress Response - no subcategory | SigmaB stress response regulation | RsbS, negative regulator of sigma-B                                               |
| 61 | Scaffold5 size51851_6135_5650                                                                                                                                                                                                                                                                            | Stress Response - no subcategory | SigmaB stress response regulation | Serine-protein kinase RsbW (EC 2.7.11.1)                                          |
| 62 | Scaffold5 size51851_7534_6524;<br>scaffold11 size4199117_3238648_3239790                                                                                                                                                                                                                                 | Stress Response - no subcategory | SigmaB stress response regulation | Serine phosphatase RsbU, regulator of sigma subunit                               |
| 63 | Scaffold5 size51851_9148_8312;<br>Scaffold9 size151310_78883_78131                                                                                                                                                                                                                                       | Stress Response - no subcategory | SigmaB stress response regulation | RsbR, positive regulator of sigma-B                                               |
| 64 | Scaffold5 size51851_5684_4890                                                                                                                                                                                                                                                                            | Stress Response - no subcategory | SigmaB stress response regulation | RNA polymerase sigma factor SigB                                                  |
| 65 | Scaffold5 size51851_6464_6132;<br>scaffold11 size4199117_496685_497035                                                                                                                                                                                                                                   | Stress Response - no subcategory | SigmaB stress response regulation | Anti-sigma B factor antagonist RsbV                                               |
| 66 | scaffold11 size4199117_4160054_4158849                                                                                                                                                                                                                                                                   | Stress Response - no subcategory | Dimethylarginine metabolism       | Ornithine aminotransferase (EC 2.6.1.13)                                          |
| 67 | scaffold11 size4199117_2416620_2415760                                                                                                                                                                                                                                                                   | Stress Response - no subcategory | Dimethylarginine metabolism       | NG,NG-dimethylargininedimethylaminohydrolase 1 (EC 3.5.3.18)                      |
| 68 | scaffold11 size4199117_1047708_1049423;<br>scaffold11 size4199117_1355489_1357138;<br>scaffold11 size4199117_2365420_2363696;<br>scaffold11 size4199117_3316388_3313620;<br>scaffold11 size4199117_3709491_3707041;<br>scaffold11 size4199117_3714227_3711696;<br>scaffold11 size4199117_3753056_3751083 | Stress Response - no subcategory | Bacterial hemoglobins             | diguanylatecyclase/phosphodiesterase (GGDEF & EAL domains) with PAS/PAC sensor(s) |
| 69 | scaffold11 size4199117_2301076_2300714                                                                                                                                                                                                                                                                   | Stress Response - no subcategory | Bacterial hemoglobins             | Cyanoglobin                                                                       |
| 70 | scaffold11 size4199117_4089899_4090309                                                                                                                                                                                                                                                                   | Stress Response - no subcategory | Bacterial hemoglobins             | Hemoglobin-like protein HbO                                                       |
| 71 | scaffold11 size4199117_788390_789652                                                                                                                                                                                                                                                                     | Stress Response - no subcategory | Hfl operon                        | GTP-binding protein HflX                                                          |

|    |                                      |                                  |                   |                             |
|----|--------------------------------------|----------------------------------|-------------------|-----------------------------|
| 72 | scaffold11 size4199117_786100_786324 | Stress Response - no subcategory | Hfl operon        | RNA-binding protein Hfq     |
| 73 | Scaffold10 size375231_180824_180594  | Stress Response - no subcategory | Carbon Starvation | Carbon storage regulator    |
| 74 | Scaffold10 size375231_315046_316854  | Stress Response - no subcategory | Carbon Starvation | Carbon starvation protein A |

Table S9. Nitrogen metabolism genes in *B.aryabhatai* AB211

| No. | Contig_id/Size/start-end                                                                                                     | Subcategory                          | Subsystem                          | Function (EC No.)                                          |
|-----|------------------------------------------------------------------------------------------------------------------------------|--------------------------------------|------------------------------------|------------------------------------------------------------|
| 1   | scaffold11 size4199117_379142_379750                                                                                         | Nitrogen Metabolism - no subcategory | Nitric oxide synthase              | Manganese superoxide dismutase (EC 1.15.1.1)               |
| 2   | scaffold11 size4199117_1003897_1005111;<br>scaffold11 size4199117_2672748_2671537;<br>scaffold11 size4199117_2887694_2888926 | Nitrogen Metabolism - no subcategory | Nitric oxide synthase              | putative cytochrome P450 hydroxylase                       |
| 3   | Scaffold9 size151310_52904_51819                                                                                             | Nitrogen Metabolism - no subcategory | Nitric oxide synthase              | Nitric oxide synthase oxygenase (EC 1.-.-)                 |
| 4   | Scaffold9 size151310_51017_51466                                                                                             | Nitrogen Metabolism - no subcategory | Nitrosative stress                 | Nitrite-sensitive transcriptional repressor NsrR           |
| 5   | scaffold11 size4199117_4036943_4034793                                                                                       | Nitrogen Metabolism - no subcategory | Nitrate and nitrite ammonification | Assimilatory nitrate reductase large subunit (EC:1.7.99.4) |
| 6   | scaffold11 size4199117_3144449_3143118;<br>scaffold11 size4199117_4033563_4034744                                            | Nitrogen Metabolism - no subcategory | Nitrate and nitrite ammonification | Nitrate/nitrite transporter                                |
| 7   | Scaffold5 size51851_19236_19748                                                                                              | Nitrogen Metabolism - no subcategory | Nitrate and nitrite ammonification | PolyferredoxinNapH (periplasmic nitrate reductase)         |
| 8   | scaffold11 size4199117_2215840_2216958;<br>scaffold11 size4199117_3271795_3270575                                            | Nitrogen Metabolism - no subcategory | Nitrate and nitrite ammonification | Nitrate/nitrite sensor protein (EC 2.7.3.-)                |
| 9   | scaffold11 size4199117_3637966_3637640                                                                                       | Nitrogen Metabolism - no subcategory | Nitrate and nitrite ammonification | Nitrite reductase [NAD(P)H] small subunit (EC 1.7.1.4)     |
| 10  | scaffold11 size4199117_3640399_3637985;<br>scaffold11 size4199117_4039308_4036963                                            | Nitrogen Metabolism - no subcategory | Nitrate and nitrite ammonification | Nitrite reductase [NAD(P)H] large subunit (EC 1.7.1.4)     |
| 11  | scaffold11 size4199117_791603_792937                                                                                         | Nitrogen Metabolism - no subcategory | Ammonia assimilation               | Glutamine synthetase type I (EC 6.3.1.2)                   |
| 12  | scaffold11 size4199117_2629942_2628461                                                                                       | Nitrogen Metabolism - no subcategory | Ammonia assimilation               | Glutamate synthase [NADPH] small chain (EC 1.4.1.13)       |
| 13  | scaffold11 size4199117_3649858_3648278                                                                                       | Nitrogen Metabolism - no subcategory | Ammonia assimilation               | Ferredoxin-dependent glutamate synthase (EC 1.4.7.1)       |

|    |                                                                                                                              |                                      |                                      |                                                      |
|----|------------------------------------------------------------------------------------------------------------------------------|--------------------------------------|--------------------------------------|------------------------------------------------------|
| 14 | Scaffold6 size49359_46708_46379;<br>scaffold11 size4199117_1815523_1815885;<br>scaffold11 size4199117_4166551_4166210        | Nitrogen Metabolism - no subcategory | Ammonia assimilation                 | Nitrogen regulatory protein P-II                     |
| 15 | scaffold11 size4199117_3171103_3169058                                                                                       | Nitrogen Metabolism - no subcategory | Ammonia assimilation                 | Nitrogen regulation protein NR(I)                    |
| 16 | scaffold11 size4199117_1814282_1815508;<br>scaffold11 size4199117_2101215_2102498;<br>scaffold11 size4199117_4166551_4166210 | Nitrogen Metabolism - no subcategory | Ammonia assimilation                 | Ammonium transporter                                 |
| 17 | scaffold11 size4199117_2634512_2629959;<br>scaffold11 size4199117_3590446_3591243                                            | Nitrogen Metabolism - no subcategory | Ammonia assimilation                 | Glutamate synthase [NADPH] large chain (EC 1.4.1.13) |
| 18 | scaffold11 size4199117_2566218_2564302                                                                                       | Denitrification                      | Denitrifying reductase gene clusters | Nitric oxide reductase activation protein NorD       |
| 19 | scaffold11 size4199117_2567120_2566230                                                                                       | Denitrification                      | Denitrifying reductase gene clusters | Nitric oxide reductase activation protein NorQ       |



Table S10. Siderophores and iron acquisition genes in *B. aryabhatai* AB211

| No. | Contig_id/Size/start-end                                                                                                   | Subcategory  | Subsystem                | Function (EC No.)                                                                           |
|-----|----------------------------------------------------------------------------------------------------------------------------|--------------|--------------------------|---------------------------------------------------------------------------------------------|
| 1   | scaffold11 size4199117_828645_830399                                                                                       | Siderophores | Siderophore assembly kit | Siderophoresynthetase large component, acetyltransferase                                    |
| 2   | scaffold11 size4199117_825781_827145;<br>scaffold11 size4199117_3726269_3724953;<br>scaffold11 size4199117_3865838_3864519 | Siderophores | Siderophore assembly kit | Siderophore biosynthesis diaminobutyrate--2-oxoglutarate aminotransferase (EC 2.6.1.76)     |
| 3   | scaffold11 size4199117_827147_828667;<br>scaffold11 size4199117_2921055_2922182                                            | Siderophores | Siderophore assembly kit | Siderophore biosynthesis L-2,4-diaminobutyrate decarboxylase                                |
| 4   | scaffold11 size4199117_833412_835217                                                                                       | Siderophores | Siderophore assembly kit | Siderophoresynthetase component, ligase                                                     |
| 5   | Scaffold10 size375231_80916_81902                                                                                          | Siderophores | Siderophore assembly kit | ABC-type Fe <sup>3+</sup> -siderophore transport system, periplasmic iron-binding component |
| 6   | scaffold11 size4199117_3334345_3333104                                                                                     | Siderophores | Siderophore assembly kit | Siderophore transport protein                                                               |
| 7   | scaffold14 size51411_36790_39498                                                                                           | Siderophores | Siderophore assembly kit | Siderophore biosynthesis non-ribosomal peptide synthetase modules                           |
| 8   | Scaffold10 size375231_78659_77832;<br>scaffold11 size4199117_3308550_3307765                                               | Siderophores | Siderophore assembly kit | ABC-type Fe <sup>3+</sup> -siderophore transport system, ATPase component                   |
| 9   | Scaffold10 size375231_79735_78686                                                                                          | Siderophores | Siderophore assembly kit | ABC-type Fe <sup>3+</sup> -siderophore transport                                            |

|    |                                                                                                                          |                                                  |                                                             |                                                                             |
|----|--------------------------------------------------------------------------------------------------------------------------|--------------------------------------------------|-------------------------------------------------------------|-----------------------------------------------------------------------------|
|    |                                                                                                                          |                                                  |                                                             | system, permease 2 component                                                |
| 10 | scaffold11 size4199117_830396_830989                                                                                     | Siderophores                                     | Siderophore assembly kit                                    | Siderophoresynthetase small component, acetyltransferase                    |
| 11 | Scaffold10 size375231_80736_79732;<br>scaffold11 size4199117_3278700_3279710;<br>scaffold11 size4199117_3935726_3934692; | Siderophores                                     | Siderophore assembly kit                                    | ABC-type Fe <sup>3+</sup> -siderophore transport system, permease component |
| 12 | scaffold11 size4199117_830968_832257                                                                                     | Siderophores                                     | Siderophore assembly kit                                    | Siderophore biosynthesis protein, monooxygenase                             |
| 13 | scaffold11 size4199117_832261_833415                                                                                     | Siderophores                                     | Siderophore assembly kit                                    | Siderophore related permease                                                |
| 14 | scaffold11 size4199117_1584854_1585849                                                                                   | Siderophores                                     | SiderophoreAnthrachelin                                     | Iron compound ABC uptake transporter substrate-binding protein              |
| 15 | scaffold11 size4199117_1584114_1584872                                                                                   | Siderophores                                     | SiderophoreAnthrachelin                                     | Uncharacterized iron compound ABC uptake transporter, ATP-binding protein   |
| 16 | scaffold11 size4199117_1582230_1583180;<br>scaffold11 size4199117_1583173_1584120                                        | Siderophores                                     | SiderophoreAnthrachelin                                     | Iron compound ABC uptake transporter permease protein                       |
| 17 | scaffold11 size4199117_1530119_1530793                                                                                   | Iron acquisition and metabolism - no subcategory | Heme, hemin uptake and utilization systems in GramPositives | Two-component response regulator colocalized with HrtAB transporter         |
| 18 | scaffold11 size4199117_3310555_3309548                                                                                   | Iron acquisition and metabolism - no subcategory | Heme, hemin uptake and utilization systems in GramPositives | Heme ABC type transporter HtsABC, permease protein HtsB                     |
| 19 | scaffold11 size4199117_3311596_3310646;<br>scaffold11 size4199117_3936750_3935806                                        | Iron acquisition and metabolism - no subcategory | Heme, hemin uptake and utilization systems in GramPositives | Heme ABC type transporter HtsABC, heme-binding protein                      |
| 20 | Scaffold10 size375231_94155_92800;<br>Scaffold10 size375231_342545_340638                                                | Iron acquisition and metabolism - no subcategory | Heme, hemin uptake and utilization systems in               | Two-component sensor kinase SA14-24                                         |

|    |                                                                                   |                                                     | GramPositives                                                     |                                                                      |
|----|-----------------------------------------------------------------------------------|-----------------------------------------------------|-------------------------------------------------------------------|----------------------------------------------------------------------|
| 21 | scaffold11 size4199117_1530790_1532172;<br>scaffold11 size4199117_2611555_2610176 | Iron acquisition and metabolism -<br>no subcategory | Heme, hemin uptake and<br>utilization systems in<br>GramPositives | Sensor histidine kinase<br>colocalized with<br>HrtAB transporter     |
| 22 | scaffold11 size4199117_3309551_3308571;<br>scaffold11 size4199117_3934685_3933669 | Iron acquisition and metabolism -<br>no subcategory | Heme, hemin uptake and<br>utilization systems in<br>GramPositives | Heme ABC type<br>transporter HtsABC,<br>permease protein HtsC        |
| 23 | Scaffold10 size375231_343259_342552                                               | Iron acquisition and metabolism -<br>no subcategory | Heme, hemin uptake and<br>utilization systems in<br>GramPositives | Two-component<br>response regulator<br>SA14-24                       |
| 24 | scaffold11 size4199117_1533330_1534025                                            | Iron acquisition and metabolism -<br>no subcategory | Heme, hemin uptake and<br>utilization systems in<br>GramPositives | Heme efflux system<br>ATPase HrtA                                    |
| 25 | scaffold11 size4199117_1532245_1533330                                            | Iron acquisition and metabolism -<br>no subcategory | Heme, hemin uptake and<br>utilization systems in<br>GramPositives | Heme efflux system<br>permeaseHrtB                                   |
| 26 | Scaffold10 size375231_92053_92766                                                 | Iron acquisition and metabolism -<br>no subcategory | Ferrous iron transporter<br>EfeUOB, low-pH-<br>induced            | Ferrous iron transport<br>permeaseEfeU                               |
| 27 | scaffold11 size4199117_175181_175954                                              | Iron acquisition and metabolism -<br>no subcategory | Heme, hemin uptake and<br>utilization systems in<br>GramNegatives | Electron transfer<br>flavoprotein, beta<br>subunit                   |
| 28 | scaffold11 size4199117_1590111_1589497                                            | Iron acquisition and metabolism -<br>no subcategory | Heme, hemin uptake and<br>utilization systems in<br>GramNegatives | Flavinreductase (EC<br>1.5.1.30)                                     |
| 29 | scaffold11 size4199117_3276900_3277694                                            | Iron acquisition and metabolism -<br>no subcategory | Heme, hemin uptake and<br>utilization systems in<br>GramNegatives | Ferrichrome transport<br>ATP-binding protein<br>FhuC (TC 3.A.1.14.3) |

Table S11. Antibiotic and heavy metal resistance genes in *Bacillus aryabhatai* AB211

| No | Contig_id/Size/start-end                                                                                                                                                                                | Subcategory                                                  | Subsystem                      | Function (EC No.)                                           |
|----|---------------------------------------------------------------------------------------------------------------------------------------------------------------------------------------------------------|--------------------------------------------------------------|--------------------------------|-------------------------------------------------------------|
| 1  | scaffold11 size4199117_1014685_1 15356;<br>scaffold11 size4199117_1497004_1496312                                                                                                                       | Bacteriocins, ribosomally synthesized antibacterial peptides | Bacitracin Stress Response     | Two-component response regulator BceR                       |
| 2  | scaffold11 size4199117_3979521_3980390                                                                                                                                                                  | Bacteriocins, ribosomally synthesized antibacterial peptides | Bacitracin Stress Response     | Conserved protein LiaG in <i>B. subtilis</i> in Lia cluster |
| 3  | scaffold11 size4199117_3364384_3363758                                                                                                                                                                  | Bacteriocins, ribosomally synthesized antibacterial peptides | Bacitracin Stress Response     | Response regulator LiaR                                     |
| 4  | scaffold11 size4199117_1016833_1017600;<br>scaffold11 size4199117_1495214_1494453                                                                                                                       | Bacteriocins, ribosomally synthesized antibacterial peptides | Bacitracin Stress Response     | Bacitracin export ATP-binding protein BceA                  |
| 5  | scaffold11 size4199117_1494463_1492517                                                                                                                                                                  | Bacteriocins, ribosomally synthesized antibacterial peptides | Bacitracin Stress Response     | Bacitracin export permease protein BceB                     |
| 6  | scaffold11 size4199117_1015358_1016392;<br>scaffold11 size4199117_1496319_1495315                                                                                                                       | Bacteriocins, ribosomally synthesized antibacterial peptides | Bacitracin Stress Response     | Two-component sensor histidine kinase BceS                  |
| 7  | Scaffold9 size151310_39899_41818;<br>scaffold11 size4199117_1625736_1623178;<br>scaffold11 size4199117_2806918_2804501;<br>scaffold11 size4199117_2964713_2962596;<br>scaffold12 size137365_55382_57805 | Resistance to antibiotics and toxic compounds                | Copper homeostasis             | Copper-translocating P-type ATPase (EC 3.6.3.4)             |
| 8  | scaffold11 size4199117_1751353_1751913                                                                                                                                                                  | Resistance to antibiotics and toxic compounds                | Copper homeostasis             | Copper resistance protein CopC                              |
| 9  | Scaffold9 size151310_107510_106290                                                                                                                                                                      | Resistance to antibiotics and toxic compounds                | Copper homeostasis             | Multidrug resistance transporter, Bcr/CflA family           |
| 10 | scaffold11 size4199117_2973022_2971418                                                                                                                                                                  | Resistance to antibiotics and toxic compounds                | Copper homeostasis             | Copper resistance protein D                                 |
| 11 | Scaffold4 size36871_26265_25369;<br>Scaffold8 size138119_89273_88398;<br>Scaffold9 size151310_38982_38056;<br>scaffold11 size4199117_3007851_3007714                                                    | Resistance to antibiotics and toxic compounds                | Cobalt-zinc-cadmium resistance | Cobalt-zinc-cadmium resistance protein                      |
| 12 | Scaffold9 size151310_38982_38056;<br>scaffold11 size4199117_3007851_3007714                                                                                                                             | Resistance to antibiotics and toxic compounds                | Cobalt-zinc-cadmium resistance | Cobalt-zinc-cadmium resistance protein CzcD                 |
| 13 | scaffold11 size4199117_2661165_2660731                                                                                                                                                                  | Resistance to antibiotics and toxic compounds                | Cobalt-zinc-cadmium resistance | Heavy metal resistance transcriptional regulator HmrR       |

|    |                                                                                                                                                                     |                                               |                                                                         |                                                                            |
|----|---------------------------------------------------------------------------------------------------------------------------------------------------------------------|-----------------------------------------------|-------------------------------------------------------------------------|----------------------------------------------------------------------------|
| 14 | Scaffold9 size151310_108399_107578                                                                                                                                  | Resistance to antibiotics and toxic compounds | Cobalt-zinc-cadmium resistance                                          | Transcriptional regulator, MerR family                                     |
| 15 | scaffold11 size4199117_2265586_2264624;<br>scaffold11 size4199117_2469212_2470150                                                                                   | Resistance to antibiotics and toxic compounds | Resistance to Vancomycin                                                | Vancomycin B-type resistance protein VanW                                  |
| 16 | scaffold11 size4199117_2906442_2904379                                                                                                                              | Resistance to antibiotics and toxic compounds | Zinc resistance                                                         | Sensor protein of zinc sigma-54-dependent two-component system             |
| 17 | scaffold11 size4199117_2845131_2843212;<br>scaffold11 size4199117_3727713_3726343                                                                                   | Resistance to antibiotics and toxic compounds | Zinc resistance                                                         | Response regulator of zinc sigma-54-dependent two-component system         |
| 18 | scaffold11 size4199117_2040497_2041129;<br>scaffold11 size4199117_3284294_3283656;<br>scaffold11 size4199117_3896528_3895890                                        | Resistance to antibiotics and toxic compounds | Multidrug Resistance, 2-protein version Found in Gram-positive bacteria | Multidrug resistance protein [function not yet clear]                      |
| 19 | Scaffold8 size138119_108027_108539;<br>scaffold11 size4199117_2005328_2006752;<br>scaffold11 size4199117_3283622_3281997;<br>scaffold11 size4199117_3895847_3894222 | Resistance to antibiotics and toxic compounds | Multidrug Resistance, 2-protein version Found in Gram-positive bacteria | Membrane component of multidrug resistance system                          |
| 20 | scaffold11 size4199117_1165204_1165836;<br>scaffold11 size4199117_1833801_1833193;<br>scaffold11 size4199117_3004504_3003896                                        | Resistance to antibiotics and toxic compounds | Multidrug Resistance, 2-protein version Found in Gram-positive bacteria | TetR family regulatory protein of MDR cluster                              |
| 21 | Scaffold7 size59084_29442_27364                                                                                                                                     | Resistance to antibiotics and toxic compounds | Tetracycline resistance, ribosome protection type                       | Translation elongation factor G                                            |
| 22 | scaffold11 size4199117_2253717_2255678                                                                                                                              | Resistance to antibiotics and toxic compounds | Tetracycline resistance, ribosome protection type                       | Ribosome protection-type tetracycline resistance related proteins, group 2 |
| 23 | scaffold11 size4199117_1635934_1636476;<br>scaffold11 size4199117_2556276_2556827                                                                                   | Resistance to antibiotics and toxic compounds | Aminoglycoside adenylyltransferases                                     | Aminoglycoside N6'-acetyltransferase (EC 2.3.1.82)                         |
| 24 | Scaffold10 size375231_370381_372297                                                                                                                                 | Resistance to antibiotics and toxic compounds | Resistance to fluoroquinolones                                          | DNA gyrase subunit B (EC 5.99.1.3)                                         |
| 25 | Scaffold10 size375231_372424_374934                                                                                                                                 | Resistance to antibiotics and toxic compounds | Resistance to fluoroquinolones                                          | DNA gyrase subunit A (EC 5.99.1.3)                                         |
| 26 | scaffold11 size4199117_2173143_2175119                                                                                                                              | Resistance to antibiotics and toxic compounds | Resistance to fluoroquinolones                                          | Topoisomerase IV subunit B (EC 5.99.1.-)                                   |
| 27 | scaffold11 size4199117_2175116_2177542                                                                                                                              | Resistance to antibiotics and toxic compounds | Resistance to fluoroquinolones                                          | Topoisomerase IV subunit A (EC 5.99.1.-)                                   |

|    |                                                                                                                              |                                                  |                                                           |                                                                                                                        |
|----|------------------------------------------------------------------------------------------------------------------------------|--------------------------------------------------|-----------------------------------------------------------|------------------------------------------------------------------------------------------------------------------------|
| 28 | scaffold11 size4199117_2795693_2795343;sc<br>affold11 size4199117_3033457_3033128                                            | Resistance to antibiotics and toxic<br>compounds | Arsenic resistance                                        | Arsenical resistance<br>operon repressor                                                                               |
| 29 | scaffold11 size4199117_2795326_2794028;<br>scaffold11 size4199117_3034228_3035526;<br>scaffold11 size4199117_3731144_3732499 | Resistance to antibiotics and toxic<br>compounds | Arsenic resistance                                        | Arsenic efflux pump<br>protein                                                                                         |
| 30 | Scaffold10 size375231_69815_69459;<br>scaffold11 size4199117_3035551_3035973                                                 | Resistance to antibiotics and toxic<br>compounds | Arsenic resistance                                        | Arsenate reductase (EC<br>1.20.4.1)                                                                                    |
| 31 | scaffold11 size4199117_2540763_2540335                                                                                       | Resistance to antibiotics and toxic<br>compounds | Fosfomycin resistance                                     | Fosfomycin resistance<br>protein FosB                                                                                  |
| 32 | scaffold11 size4199117_1655232_1656839                                                                                       | Resistance to antibiotics and toxic<br>compounds | Multidrug Resistance Operon<br>mdtRP of Bacillus          | Multidrug efflux<br>transporter MdtP                                                                                   |
| 33 | scaffold11 size4199117_1654757_1655209;<br>scaffold11 size4199117_3281926_3281507;<br>scaffold11 size4199117_3893079_3892654 | Resistance to antibiotics and toxic<br>compounds | Multidrug Resistance Operon<br>mdtRP of Bacillus          | MdtR transcriptional<br>regulator, MarR family                                                                         |
| 34 | Scaffold7 size59084_29442_27364                                                                                              | Resistance to antibiotics and toxic<br>compounds | Tetracycline resistance,<br>ribosome protection type, too | Translation elongation<br>factor G                                                                                     |
| 35 | scaffold11 size4199117_2253717_2255678                                                                                       | Resistance to antibiotics and toxic<br>compounds | Tetracycline resistance,<br>ribosome protection type, too | Ribosome protection-<br>type tetracycline<br>resistance related<br>proteins, group 2                                   |
| 36 | scaffold11 size4199117_1471941_1472873                                                                                       | Resistance to antibiotics and toxic<br>compounds | Beta-lactamase                                            | Beta-lactamase class A                                                                                                 |
| 37 | scaffold11 size4199117_3042191_3041163;<br>scaffold11 size4199117_3318782_3318006                                            | Resistance to antibiotics and toxic<br>compounds | Beta-lactamase                                            | Beta-lactamase (EC<br>3.5.2.6)                                                                                         |
| 38 | Scaffold8 size138119_4728_3997;<br>scaffold11 size4199117_2305326_2304547                                                    | Resistance to antibiotics and toxic<br>compounds | Beta-lactamase                                            | Metal-dependent<br>hydrolases of the beta-<br>lactamase superfamily I                                                  |
| 39 | scaffold11 size4199117_1626127_1625768                                                                                       | Resistance to antibiotics and toxic<br>compounds | Cadmium resistance                                        | Cadmium efflux system<br>accessory protein                                                                             |
| 40 | scaffold11 size4199117_2041283_2042677;<br>scaffold11 size4199117_2737257_2738630;<br>scaffold11 size4199117_2933727_2932342 | Resistance to antibiotics and toxic<br>compounds | Multidrug Resistance Efflux<br>Pumps                      | Multi antimicrobial<br>extrusion protein<br>(Na <sup>+</sup> )/drug antiporter),<br>MATE family of MDR<br>efflux pumps |
| 41 | Scaffold10 size375231_85507_82397;<br>scaffold11 size4199117_1641659_1644697;<br>scaffold11 size4199117_3721682_3718653      | Resistance to antibiotics and toxic<br>compounds | Multidrug Resistance Efflux<br>Pumps                      | Acriflavin resistance<br>protein                                                                                       |
| 42 | scaffold11 size4199117_1026905_1025670;                                                                                      | Resistance to antibiotics and toxic              | Multidrug Resistance Efflux                               | Multidrug and toxin                                                                                                    |

|    |                                        |                                               |                                   |                                                                              |
|----|----------------------------------------|-----------------------------------------------|-----------------------------------|------------------------------------------------------------------------------|
|    | scaffold11 size4199117_1595930_1595604 | compounds                                     | Pumps                             | extrusion (MATE) family efflux pump YdhE/NorM, homolog                       |
| 43 | scaffold11 size4199117_2137682_2136405 | Resistance to antibiotics and toxic compounds | Multidrug Resistance Efflux Pumps | Multidrug-efflux transporter, major facilitator superfamily (MFS) (TC 2.A.1) |

Table S12. Aromatic compound degradation pathway genes in *B. aryabhatai* AB211

| No | Contig_id/Size/start-end                                                          | Subcategory                                              | Subsystem                                   | Function (EC No.)                                                                                                    |
|----|-----------------------------------------------------------------------------------|----------------------------------------------------------|---------------------------------------------|----------------------------------------------------------------------------------------------------------------------|
| 1  | scaffold11 size4199117_1835207_1836721                                            | Peripheral pathways for catabolism of aromatic compounds | Salicylate ester degradation                | Salicylate hydroxylase (EC 1.14.13.1)                                                                                |
| 2  | scaffold11 size4199117_418568_419005                                              | Peripheral pathways for catabolism of aromatic compounds | Quinate degradation                         | 3-dehydroquinate dehydratase II (EC 4.2.1.10)                                                                        |
| 3  | scaffold11 size4199117_3836324_3835428                                            | Peripheral pathways for catabolism of aromatic compounds | Quinate degradation                         | Shikimate/quinic 5-dehydrogenase I beta (EC 1.1.1.282)                                                               |
| 4  | scaffold11 size4199117_3853469_3852684                                            | Peripheral pathways for catabolism of aromatic compounds | Quinate degradation                         | 3-dehydroquinate dehydratase I (EC 4.2.1.10)                                                                         |
| 5  | scaffold11 size4199117_1301332_1300952                                            | Peripheral pathways for catabolism of aromatic compounds | Biphenyl Degradation                        | biphenyl-2,3-diol 1,2-dioxygenase III-related protein                                                                |
| 6  | scaffold11 size4199117_1276248_1277165                                            | Peripheral pathways for catabolism of aromatic compounds | Biphenyl Degradation                        | Acetaldehyde dehydrogenase, acetylating, (EC 1.2.1.10) in gene cluster for degradation of phenols, cresols, catechol |
| 7  | scaffold11 size4199117_1193388_1194917                                            | Peripheral pathways for catabolism of aromatic compounds | Biphenyl Degradation                        | Acetaldehyde dehydrogenase (EC 1.2.1.10)                                                                             |
| 8  | scaffold11 size4199117_1277155_1278180;<br>scaffold11 size4199117_3045726_3046685 | Peripheral pathways for catabolism of aromatic compounds | Biphenyl Degradation                        | 4-hydroxy-2-oxovalerate aldolase (EC 4.1.3.39)                                                                       |
| 9  | scaffold11 size4199117_3223019_3221727                                            | Peripheral pathways for catabolism of aromatic compounds | Benzoate degradation                        | benzoate MFS transporter BenK                                                                                        |
| 10 | scaffold11 size4199117_486815_487504;<br>scaffold11 size4199117_2347840_2347178   | Metabolism of central aromatic intermediates             | Catechol branch of beta-ketoadipate pathway | Succinyl-CoA:3-ketoacid-coenzyme A transferase subunit A (EC 2.8.3.5)                                                |
| 11 | scaffold11 size4199117_487525_488193;<br>scaffold11 size4199117_2347840_2347178   | Metabolism of central aromatic intermediates             | Catechol branch of beta-ketoadipate pathway | Succinyl-CoA:3-ketoacid-coenzyme A transferase subunit B (EC 2.8.3.5)                                                |
| 12 | scaffold11 size4199117_1835207_1836721                                            | Metabolism of central aromatic intermediates             | Salicylate and gentisate catabolism         | Salicylate hydroxylase (EC 1.14.13.1)                                                                                |
| 13 | scaffold11 size4199117_1865502_1866278;<br>scaffold11 size4199117_3955350_3954718 | Metabolism of central aromatic intermediates             | Salicylate and gentisate catabolism         | Fumarylacetoacetate hydrolase family protein                                                                         |
| 14 | scaffold11 size4199117_1269121_1270599;<br>scaffold11 size4199117_2300574_2299138 | Metabolism of Aromatic Compounds - no subcategory        | Aromatic Amin Catabolism                    | 4-hydroxyphenylacetate 3-monooxygenase (EC 1.14.13.3)                                                                |



|    |                                                                                   |                                                      |                          |                                                              |
|----|-----------------------------------------------------------------------------------|------------------------------------------------------|--------------------------|--------------------------------------------------------------|
| 15 | scaffold11 size4199117_3885013_3884402                                            | Metabolism of Aromatic Compounds -<br>no subcategory | Aromatic Amin Catabolism | Nitrilotriacetatemonooxygenase<br>component B (EC 1.14.13.-) |
| 16 | scaffold11 size4199117_1865502_1866278;<br>scaffold11 size4199117_3955350_3954718 | Metabolism of Aromatic Compounds -<br>no subcategory | Gentisate degradation    | Fumarylacetoacetate hydrolase<br>family protein              |

Table S13. Carbohydrate metabolism in *B. aryabhatai* AB211

| No. | Contig_id/Size/start-end                                                                                                                                                                                                                                                                                 | Subcategory                     | Subsystem                                                      | Function (EC No.)                                                             |
|-----|----------------------------------------------------------------------------------------------------------------------------------------------------------------------------------------------------------------------------------------------------------------------------------------------------------|---------------------------------|----------------------------------------------------------------|-------------------------------------------------------------------------------|
| 1.  | scaffold11 size4199117_3411152_3410754                                                                                                                                                                                                                                                                   | Central carbohydrate metabolism | Methylglyoxal Metabolism                                       | Methylglyoxal synthase (EC 4.2.3.3)                                           |
| 2.  | scaffold11 size4199117_3033077_3032652                                                                                                                                                                                                                                                                   | Central carbohydrate metabolism | Methylglyoxal Metabolism                                       | Lactoylglutathione lyase (EC 4.4.1.5)                                         |
| 3.  | scaffold11 size4199117_818145_819569;<br>scaffold11 size4199117_2343307_234185;<br>scaffold11 size4199117_3347959_3346535                                                                                                                                                                                | Central carbohydrate metabolism | Methylglyoxal Metabolism                                       | Aldehyde dehydrogenase B (EC 1.2.1.22)                                        |
| 4.  | scaffold11 size4199117_1459375_1458071;<br>scaffold11 size4199117_2457891_2456443;<br>scaffold11 size4199117_2475755_2474229;<br>scaffold11 size4199117_2590559_2589159;<br>scaffold11 size4199117_2715819_2714326;<br>scaffold11 size4199117_2842083_2840617;<br>scaffold11 size4199117_3219860_3218421 | Central carbohydrate metabolism | Methylglyoxal Metabolism                                       | Aldehyde dehydrogenase (EC 1.2.1.3)                                           |
| 5.  | scaffold11 size4199117_480806_481762                                                                                                                                                                                                                                                                     | Central carbohydrate metabolism | Methylglyoxal Metabolism                                       | Hydroxyacylglutathione hydrolase (EC 3.1.2.6)                                 |
| 6.  | scaffold11 size4199117_2478524_2477091                                                                                                                                                                                                                                                                   | Central carbohydrate metabolism | Methylglyoxal Metabolism                                       | Aldehyde dehydrogenase A (EC 1.2.1.22)                                        |
| 7.  | scaffold11 size4199117_2014947_2016647;<br>scaffold11 size4199117_3651623_3649902                                                                                                                                                                                                                        | Central carbohydrate metabolism | Pyruvate metabolism II: acetyl-CoA, acetogenesis from pyruvate | Pyruvate oxidase [ubiquinone, cytochrome] (EC 1.2.2.2)                        |
| 8.  | scaffold11 size4199117_3747202_3745739;<br>scaffold11 size4199117_4002377_4003876                                                                                                                                                                                                                        | Central carbohydrate metabolism | Pyruvate metabolism II: acetyl-CoA, acetogenesis from pyruvate | Acetate permease ActP (cation/acetate symporter)                              |
| 9.  | scaffold11 size4199117_1193388_1194917                                                                                                                                                                                                                                                                   | Central carbohydrate metabolism | Pyruvate metabolism II: acetyl-CoA, acetogenesis from pyruvate | Acetaldehyde dehydrogenase (EC 1.2.1.10)                                      |
| 10. | scaffold11 size4199117_88283_89998                                                                                                                                                                                                                                                                       | Central carbohydrate metabolism | Pyruvate metabolism II: acetyl-CoA, acetogenesis from pyruvate | Acetyl-coenzyme A synthetase (EC 6.2.1.1)                                     |
| 11. | scaffold11 size4199117_3445873_3444461                                                                                                                                                                                                                                                                   | Central carbohydrate metabolism | Pyruvate metabolism II: acetyl-CoA, acetogenesis from pyruvate | Dihydrolipoamide dehydrogenase of pyruvate dehydrogenase complex (EC 1.8.1.4) |
| 12. | scaffold11 size4199117_3449377_3448262                                                                                                                                                                                                                                                                   | Central carbohydrate            | Pyruvate metabolism II:                                        | Pyruvate dehydrogenase E1 component alpha                                     |

|     |                                                                           |                                 |                                                                |                                                                                              |
|-----|---------------------------------------------------------------------------|---------------------------------|----------------------------------------------------------------|----------------------------------------------------------------------------------------------|
|     |                                                                           | metabolism                      | acetyl-CoA, acetogenesis from pyruvate                         | subunit (EC 1.2.4.1)                                                                         |
| 13. | scaffold11 size4199117_900664_901383                                      | Central carbohydrate metabolism | Pyruvate metabolism II: acetyl-CoA, acetogenesis from pyruvate | NAD-dependent protein deacetylase of SIR2 family                                             |
| 14. | scaffold11 size4199117_86694_85531                                        | Central carbohydrate metabolism | Pyruvate metabolism II: acetyl-CoA, acetogenesis from pyruvate | NAD-independent protein deacetylase AcuC                                                     |
| 15. | scaffold11 size4199117_3448258_3447281                                    | Central carbohydrate metabolism | Pyruvate metabolism II: acetyl-CoA, acetogenesis from pyruvate | Pyruvate dehydrogenase E1 component beta subunit (EC 1.2.4.1)                                |
| 16. | scaffold11 size4199117_3447178_3445877                                    | Central carbohydrate metabolism | Pyruvate metabolism II: acetyl-CoA, acetogenesis from pyruvate | Dihydrolipoamide acetyltransferase component of pyruvate dehydrogenase complex (EC 2.3.1.12) |
| 17. | Scaffold10 size375231_274835_273864                                       | Central carbohydrate metabolism | Pyruvate metabolism II: acetyl-CoA, acetogenesis from pyruvate | Phosphate acetyltransferase (EC 2.3.1.8)                                                     |
| 18. | scaffold11 size4199117_108680_109870                                      | Central carbohydrate metabolism | Pyruvate metabolism II: acetyl-CoA, acetogenesis from pyruvate | Acetate kinase (EC 2.7.2.1)                                                                  |
| 19. | scaffold11 size4199117_87998_87366                                        | Central carbohydrate metabolism | Pyruvate metabolism II: acetyl-CoA, acetogenesis from pyruvate | Acetyltransferase AcuA, acetyl-CoA synthetase inhibitor                                      |
| 20. | Scaffold9 size151310_26289_24946;<br>scaffold11 size4199117_938218_936848 | Central carbohydrate metabolism | Pyruvate Alanine Serine Interconversions                       | D-serine/D-alanine/glycine transporter                                                       |
| 21. | scaffold11 size4199117_657973_658860                                      | Central carbohydrate metabolism | Pyruvate Alanine Serine Interconversions                       | L-serine dehydratase, alpha subunit (EC 4.3.1.17)                                            |
| 22. | scaffold11 size4199117_2205327_2206400                                    | Central carbohydrate metabolism | Pyruvate Alanine Serine Interconversions                       | Branched-chain amino acid aminotransferase (EC 2.6.1.42)                                     |
| 23. | scaffold11 size4199117_657212_657874                                      | Central carbohydrate metabolism | Pyruvate Alanine Serine Interconversions                       | L-serine dehydratase, beta subunit (EC 4.3.1.17)                                             |
| 24. | scaffold11 size4199117_2327809_2326508                                    | Central carbohydrate metabolism | Pyruvate Alanine Serine Interconversions                       | Valine--pyruvate aminotransferase (EC 2.6.1.66)                                              |
| 25. | Scaffold5 size51851_11333_10143                                           | Central carbohydrate metabolism | Pyruvate Alanine Serine Interconversions                       | Alanine racemase (EC 5.1.1.1)                                                                |
| 26. | scaffold11 size4199117_2367088_2365970                                    | Central carbohydrate metabolism | Pyruvate Alanine Serine Interconversions                       | D-amino acid dehydrogenase small subunit (EC 1.4.99.1)                                       |
| 27. | scaffold11 size4199117_1728909_1730159                                    | Central carbohydrate            | Pyruvate Alanine Serine                                        | L-alanine:glyoxylate aminotransferase (EC                                                    |

|     |                                                                                 |                                    |                                             |                                                                                     |
|-----|---------------------------------------------------------------------------------|------------------------------------|---------------------------------------------|-------------------------------------------------------------------------------------|
|     |                                                                                 | metabolism                         | Interconversions                            | 2.6.1.44)                                                                           |
| 28. | Scaffold10 size375231_284246_285379;<br>scaffold11 size4199117_114674_115795    | Central carbohydrate<br>metabolism | Pyruvate Alanine Serine<br>Interconversions | Alanine dehydrogenase (EC 1.4.1.1)                                                  |
| 29. | scaffold11 size4199117_2665899_2667257                                          | Central carbohydrate<br>metabolism | Pyruvate Alanine Serine<br>Interconversions | D-serine dehydratase (EC 4.3.1.18)                                                  |
| 30. | scaffold11 size4199117_861559_860714                                            | Central carbohydrate<br>metabolism | Pyruvate Alanine Serine<br>Interconversions | D-alanine aminotransferase (EC 2.6.1.21)                                            |
| 31. | scaffold11 size4199117_1863217_1865394                                          | Central carbohydrate<br>metabolism | Glyoxylate bypass                           | Malate synthase G (EC 2.3.3.9)                                                      |
| 32. | scaffold11 size4199117_136342_137280;<br>scaffold11 size4199117_1197291_1198247 | Central carbohydrate<br>metabolism | Glyoxylate bypass                           | Malate dehydrogenase (EC 1.1.1.37)                                                  |
| 33. | scaffold11 size4199117_133827_134945;<br>scaffold11 size4199117_1692443_1693546 | Central carbohydrate<br>metabolism | Glyoxylate bypass                           | Citrate synthase (si) (EC 2.3.3.1)                                                  |
| 34. | scaffold11 size4199117_4196263_4194980                                          | Central carbohydrate<br>metabolism | Glyoxylate bypass                           | Isocitrate lyase (EC 4.1.3.1)                                                       |
| 35. | scaffold11 size4199117_2163739_2166459                                          | Central carbohydrate<br>metabolism | Glyoxylate bypass                           | Aconitate hydratase (EC 4.2.1.3)                                                    |
| 36. | scaffold11 size4199117_3027809_3026046                                          | Central carbohydrate<br>metabolism | Dihydroxyacetone kinases                    | Dihydroxyacetone kinase, ATP-dependent (EC 2.7.1.29)                                |
| 37. | scaffold11 size4199117_1437089_1439017                                          | Central carbohydrate<br>metabolism | Glycolysis and<br>Gluconeogenesis           | Fructose-1,6-bisphosphatase, Bacillus type (EC 3.1.3.11)                            |
| 38. | scaffold11 size4199117_898965_899924;<br>scaffold11 size4199117_3143016_3142054 | Central carbohydrate<br>metabolism | Glycolysis and<br>Gluconeogenesis           | 6-phosphofructokinase (EC 2.7.1.11)                                                 |
| 39. | Scaffold10 size375231_119066_118311                                             | Central carbohydrate<br>metabolism | Glycolysis and<br>Gluconeogenesis           | Triosephosphate isomerase (EC 5.3.1.1)                                              |
| 40. | Scaffold10 size375231_244519_243662;<br>scaffold11 size4199117_1371867_1372736  | Central carbohydrate<br>metabolism | Glycolysis and<br>Gluconeogenesis           | Fructose-bisphosphate aldolase class II (EC 4.1.2.13)                               |
| 41. | Scaffold10 size375231_118311_116779                                             | Central carbohydrate<br>metabolism | Glycolysis and<br>Gluconeogenesis           | 2,3-bisphosphoglycerate-independent<br>phosphoglycerate mutase (EC 5.4.2.1)         |
| 42. | Scaffold10 size375231_13581_12232;<br>scaffold12 size137365_12642_11305         | Central carbohydrate<br>metabolism | Glycolysis and<br>Gluconeogenesis           | Glucose-6-phosphate isomerase (EC 5.3.1.9)                                          |
| 43. | scaffold11 size4199117_145946_146977                                            | Central carbohydrate<br>metabolism | Glycolysis and<br>Gluconeogenesis           | NADPH-dependent glyceraldehyde-3-phosphate<br>dehydrogenase (EC 1.2.1.13)           |
| 44. | scaffold11 size4199117_2897091_2895640                                          | Central carbohydrate<br>metabolism | Glycolysis and<br>Gluconeogenesis           | Non-phosphorylating glyceraldehyde-3-phosphate<br>dehydrogenase (NADP) (EC 1.2.1.9) |
| 45. | scaffold11 size4199117_394760_395728                                            | Central carbohydrate<br>metabolism | Glycolysis and<br>Gluconeogenesis           | Glucokinase (EC 2.7.1.2)                                                            |

|     |                                                                                                                                                                         |                                 |                                |                                                                                        |
|-----|-------------------------------------------------------------------------------------------------------------------------------------------------------------------------|---------------------------------|--------------------------------|----------------------------------------------------------------------------------------|
| 46. | scaffold11 size4199117_129507_131267;<br>scaffold11 size4199117_3244996_3243944                                                                                         | Central carbohydrate metabolism | Glycolysis and Gluconeogenesis | Pyruvate kinase (EC 2.7.1.40)                                                          |
| 47. | scaffold11 size4199117_1335286_1336179;<br>scaffold11 size4199117_1336202_1337836;<br>scaffold11 size4199117_2918440_2915834;<br>scaffold11 size4199117_3153525_3151012 | Central carbohydrate metabolism | Glycolysis and Gluconeogenesis | Phosphoenolpyruvate synthase (EC 2.7.9.2)                                              |
| 48. | Scaffold10 size375231_120426_119242                                                                                                                                     | Central carbohydrate metabolism | Glycolysis and Gluconeogenesis | Phosphoglycerate kinase (EC 2.7.2.3)                                                   |
| 49. | Scaffold10 size375231_116754_115459                                                                                                                                     | Central carbohydrate metabolism | Glycolysis and Gluconeogenesis | Enolase (EC 4.2.1.11)                                                                  |
| 50. | Scaffold10 size375231_121743_120736                                                                                                                                     | Central carbohydrate metabolism | Glycolysis and Gluconeogenesis | NAD-dependent glyceraldehyde-3-phosphate dehydrogenase (EC 1.2.1.12)                   |
| 51. | scaffold11 size4199117_1223432_1224385                                                                                                                                  | Central carbohydrate metabolism | Entner-Doudoroff Pathway       | 2-dehydro-3-deoxygluconate kinase (EC 2.7.1.45)                                        |
| 52. | Scaffold10 size375231_279403_280905;<br>scaffold11 size4199117_1538005_1539507;<br>scaffold11 size4199117_2786869_2785283;<br>scaffold11 size4199117_3254796_3255167    | Central carbohydrate metabolism | Entner-Doudoroff Pathway       | Glucose-6-phosphate 1-dehydrogenase (EC 1.1.1.49)                                      |
| 53. | scaffold11 size4199117_1224403_1225065;<br>scaffold11 size4199117_1786832_1787476                                                                                       | Central carbohydrate metabolism | Entner-Doudoroff Pathway       | 2-dehydro-3-deoxyphosphogluconate aldolase (EC 4.1.2.14)                               |
| 54. | scaffold11 size4199117_1225052_1226200                                                                                                                                  | Central carbohydrate metabolism | Entner-Doudoroff Pathway       | Gluconate dehydratase (EC 4.2.1.39)                                                    |
| 55. | scaffold11 size4199117_1460516_1461301;<br>scaffold11 size4199117_3470851_3470087;<br>scaffold11 size4199117_3749540_3748755;<br>scaffold11 size4199117_3965547_3964762 | Central carbohydrate metabolism | Entner-Doudoroff Pathway       | Glucose 1-dehydrogenase (EC 1.1.1.47)                                                  |
| 56. | scaffold11 size4199117_2302158_2301301                                                                                                                                  | Central carbohydrate metabolism | Entner-Doudoroff Pathway       | Gluconolactonase (EC 3.1.1.17)                                                         |
| 57. | Scaffold9 size151310_110813_109749                                                                                                                                      | Central carbohydrate metabolism | Entner-Doudoroff Pathway       | 6-phosphogluconolactonase (EC 3.1.1.31)                                                |
| 58. | scaffold11 size4199117_835361_836908;<br>scaffold11 size4199117_4065083_4063542                                                                                         | Central carbohydrate metabolism | Entner-Doudoroff Pathway       | Gluconokinase (EC 2.7.1.12)                                                            |
| 60. | scaffold11 size4199117_2858057_2856678                                                                                                                                  | Central carbohydrate metabolism | Dehydrogenase complexes        | Dihydrolipoamide dehydrogenase of acetoin dehydrogenase (EC 1.8.1.4)                   |
| 61. | scaffold11 size4199117_450547_451539                                                                                                                                    | Central carbohydrate metabolism | Dehydrogenase complexes        | Branched-chain alpha-keto acid dehydrogenase, E1 component, alpha subunit (EC 1.2.4.4) |
| 62. | scaffold11 size4199117_2860360_2859326                                                                                                                                  | Central carbohydrate metabolism | Dehydrogenase complexes        | Acetoin dehydrogenase E1 component beta-subunit (EC 1.2.4.-)                           |

|     |                                                                                   |                                 |                                                   |                                                                                                                   |
|-----|-----------------------------------------------------------------------------------|---------------------------------|---------------------------------------------------|-------------------------------------------------------------------------------------------------------------------|
| 63. | scaffold11 size4199117_2861371_2860379                                            | Central carbohydrate metabolism | Dehydrogenase complexes                           | Acetoin dehydrogenase E1 component alpha-subunit (EC 1.2.4.-)                                                     |
| 64. | scaffold11 size4199117_1831856_1833151                                            | Central carbohydrate metabolism | Dehydrogenase complexes                           | Dihydrolipoamide succinyltransferase component (E2) of 2-oxoglutarate dehydrogenase complex (EC 2.3.1.61)         |
| 65. | scaffold11 size4199117_452551_453810                                              | Central carbohydrate metabolism | Dehydrogenase complexes                           | Dihydrolipoamide acyltransferase component of branched-chain alpha-keto acid dehydrogenase complex (EC 2.3.1.168) |
| 66. | scaffold11 size4199117_451552_452535                                              | Central carbohydrate metabolism | Dehydrogenase complexes                           | Branched-chain alpha-keto acid dehydrogenase, E1 component, beta subunit (EC 1.2.4.4)                             |
| 67. | scaffold11 size4199117_2859300_2858074                                            | Central carbohydrate metabolism | Dehydrogenase complexes                           | Dihydrolipoamide acetyltransferase component (E2) of acetoin dehydrogenase complex (EC 2.3.1.-)                   |
| 68. | scaffold11 size4199117_449105_450526                                              | Central carbohydrate metabolism | Dehydrogenase complexes                           | Dihydrolipoamide dehydrogenase of branched-chain alpha-keto acid dehydrogenase (EC 1.8.1.4)                       |
| 69. | scaffold11 size4199117_1828978_1831839                                            | Central carbohydrate metabolism | Dehydrogenase complexes                           | 2-oxoglutarate dehydrogenase E1 component (EC 1.2.4.2)                                                            |
| 70. | Scaffold10 size375231_33693_32200                                                 | Central carbohydrate metabolism | Dehydrogenase complexes                           | Cytosol aminopeptidase PepA (EC 3.4.11.1)                                                                         |
| 71. | scaffold11 size4199117_135027_136313                                              | Central carbohydrate metabolism | TCA Cycle                                         | Isocitrate dehydrogenase [NADP] (EC 1.1.1.42)                                                                     |
| 72. | scaffold11 size4199117_679607_680509                                              | Central carbohydrate metabolism | TCA Cycle                                         | Succinyl-CoA ligase [ADP-forming] alpha chain (EC 6.2.1.5)                                                        |
| 73. | scaffold11 size4199117_182991_184778                                              | Central carbohydrate metabolism | TCA Cycle                                         | Succinate dehydrogenase flavoprotein subunit (EC 1.3.99.1)                                                        |
| 74. | scaffold11 size4199117_184782_185555                                              | Central carbohydrate metabolism | TCA Cycle                                         | Succinate dehydrogenase iron-sulfur protein (EC 1.3.99.1)                                                         |
| 75. | scaffold11 size4199117_1880532_1882034;<br>scaffold11 size4199117_1977271_1978773 | Central carbohydrate metabolism | TCA Cycle                                         | Malate:quinone oxidoreductase (EC 1.1.5.4)                                                                        |
| 76. | Scaffold9 size151310_30775_29234                                                  | Central carbohydrate metabolism | TCA Cycle                                         | Fumarate hydratase class I, aerobic (EC 4.2.1.2)                                                                  |
| 77. | scaffold11 size4199117_678428_679588                                              | Central carbohydrate metabolism | TCA Cycle                                         | Succinyl-CoA ligase [ADP-forming] beta chain (EC 6.2.1.5)                                                         |
| 78. | scaffold11 size4199117_2398346_2396967                                            | Central carbohydrate metabolism | TCA Cycle                                         | Fumarate hydratase class II (EC 4.2.1.2)                                                                          |
| 79. | scaffold11 size4199117_2785133_2784078                                            | Central carbohydrate metabolism | Pyruvate metabolism I: anaplerotic reactions, PEP | D-malic enzyme (EC 1.1.1.83)                                                                                      |
| 80. | scaffold11 size4199117_38349_36760                                                | Central carbohydrate            | Pyruvate metabolism I:                            | Phosphoenolpyruvate carboxykinase [ATP] (EC                                                                       |

|     |                                                                                                                                                                                                   |                                 |                                                       |                                                                                             |
|-----|---------------------------------------------------------------------------------------------------------------------------------------------------------------------------------------------------|---------------------------------|-------------------------------------------------------|---------------------------------------------------------------------------------------------|
|     |                                                                                                                                                                                                   | metabolism                      | anaplerotic reactions, PEP                            | 4.1.1.49)                                                                                   |
| 81. | scaffold11 size4199117_2670620_2669289                                                                                                                                                            | Central carbohydrate metabolism | Pyruvate metabolism I: anaplerotic reactions, PEP     | Malolactic enzyme (EC 1.-.-.-)                                                              |
| 82. | Scaffold9 size151310_80396_79671;<br>scaffold11 size4199117_2383345_2382638;<br>scaffold11 size4199117_3967331_3966645                                                                            | Central carbohydrate metabolism | Pyruvate metabolism I: anaplerotic reactions, PEP     | Two-component response regulator, malate (EC 2.7.3.-)                                       |
| 83. | Scaffold9 size151310_81990_80389;<br>scaffold11 size4199117_2384955_2383342;<br>scaffold11 size4199117_3951318_3949729;<br>scaffold11 size4199117_3968909_3967344                                 | Central carbohydrate metabolism | Pyruvate metabolism I: anaplerotic reactions, PEP     | Two-component sensor histidine kinase, malate (EC 2.7.3.-)                                  |
| 84. | scaffold11 size4199117_2086014_2086970;<br>scaffold11 size4199117_2097706_2098662                                                                                                                 | Central carbohydrate metabolism | Pyruvate metabolism I: anaplerotic reactions, PEP     | Malate permease                                                                             |
| 85. | scaffold11 size4199117_2691131_2689788;<br>scaffold11 size4199117_2956098_2954692                                                                                                                 | Central carbohydrate metabolism | Pyruvate metabolism I: anaplerotic reactions, PEP     | Malate Na(+) symporter                                                                      |
| 86. | scaffold11 size4199117_1120559_1122271;<br>scaffold11 size4199117_2095990_2097693;<br>scaffold11 size4199117_2692984_2691275                                                                      | Central carbohydrate metabolism | Pyruvate metabolism I: anaplerotic reactions, PEP     | NAD-dependent malic enzyme (EC 1.1.1.38)                                                    |
| 87. | scaffold11 size4199117_3996509_3993741                                                                                                                                                            | Central carbohydrate metabolism | Pyruvate metabolism I: anaplerotic reactions, PEP     | Phosphoenolpyruvate carboxylase (EC 4.1.1.31)                                               |
| 88. | scaffold11 size4199117_125037_126266                                                                                                                                                              | Central carbohydrate metabolism | Pyruvate metabolism I: anaplerotic reactions, PEP     | NADP-dependent malic enzyme (EC 1.1.1.40)                                                   |
| 89. | scaffold11 size4199117_3970224_3971492                                                                                                                                                            | Central carbohydrate metabolism | Pyruvate metabolism I: anaplerotic reactions, PEP     | Aerobic C4-dicarboxylate transporter for fumarate, L-malate, D-malate, succinate, aspartate |
| 90. | Scaffold10 size375231_141147_140500                                                                                                                                                               | Central carbohydrate metabolism | HPr kinase and hprK operon in Gram-positive organisms | Pyrophosphatase PpaX (EC 3.6.1.1)                                                           |
| 91. | Scaffold10 size375231_142041_141208;<br>scaffold11 size4199117_3043111_3043926                                                                                                                    | Central carbohydrate metabolism | HPr kinase and hprK operon in Gram-positive organisms | Prolipoprotein diacylglycerol transferase (EC 2.4.99.-)                                     |
| 92. | Scaffold10 size375231_142993_142058                                                                                                                                                               | Central carbohydrate metabolism | HPr kinase and hprK operon in Gram-positive organisms | HPr kinase/phosphorylase (EC 2.7.1.-) (EC 2.7.4.-)                                          |
| 93. | scaffold11 size4199117_805541_807547;<br>scaffold11 size4199117_1539536_1541530;<br>scaffold12 size137365_13114_12857;<br>scaffold12 size137365_13384_13160;<br>scaffold12 size137365_13643_13494 | Central carbohydrate metabolism | Pentose phosphate pathway                             | Transketolase (EC 2.2.1.1)                                                                  |
| 94. | scaffold11 size4199117_3148642_3147809                                                                                                                                                            | Central carbohydrate metabolism | Pentose phosphate pathway                             | Transketolase, N-terminal section (EC 2.2.1.1)                                              |
| 95. | Scaffold6 size49359_30618_29665                                                                                                                                                                   | Central carbohydrate metabolism | Pentose phosphate pathway                             | Ribose-phosphate pyrophosphokinase (EC 2.7.6.1)                                             |

|      |                                                                                                                                                                      |                                 |                                            |                                                                                     |
|------|----------------------------------------------------------------------------------------------------------------------------------------------------------------------|---------------------------------|--------------------------------------------|-------------------------------------------------------------------------------------|
| 96.  | Scaffold10 size375231_232211_231750;<br>scaffold11 size4199117_3141729_3141265                                                                                       | Central carbohydrate metabolism | Pentose phosphate pathway                  | Ribose 5-phosphate isomerase B (EC 5.3.1.6)                                         |
| 97.  | scaffold11 size4199117_3781596_3780928                                                                                                                               | Central carbohydrate metabolism | Pentose phosphate pathway                  | Ribose 5-phosphate isomerase A (EC 5.3.1.6)                                         |
| 98.  | scaffold11 size4199117_3147809_3146862                                                                                                                               | Central carbohydrate metabolism | Pentose phosphate pathway                  | Transketolase, C-terminal section (EC 2.2.1.1)                                      |
| 99.  | scaffold11 size4199117_651590_652246                                                                                                                                 | Central carbohydrate metabolism | Pentose phosphate pathway                  | Ribulose-phosphate 3-epimerase (EC 5.1.3.1)                                         |
| 100. | Scaffold10 size375231_282360_280948;<br>scaffold11 size4199117_1541561_1542454;<br>scaffold11 size4199117_3460529_3459633;<br>scaffold11 size4199117_4066008_4065109 | Central carbohydrate metabolism | Pentose phosphate pathway                  | 6-phosphogluconate dehydrogenase, decarboxylating (EC 1.1.1.44)                     |
| 101. | Scaffold10 size375231_243524_242880;<br>scaffold11 size4199117_1542504_1543172;<br>scaffold11 size4199117_2388704_2388033;<br>scaffold11 size4199117_2894177_2893509 | Central carbohydrate metabolism | Pentose phosphate pathway                  | Transaldolase (EC 2.2.1.2)                                                          |
| 102. | Scaffold10 size375231_47696_46707;<br>scaffold11 size4199117_1325554_1326519                                                                                         | Central carbohydrate metabolism | Glycolate, glyoxylate interconversions     | Glyoxylate reductase (EC 1.1.1.26)                                                  |
| 103. | scaffold14 size51411_22562_23194                                                                                                                                     | Central carbohydrate metabolism | Glycolate, glyoxylate interconversions     | Phosphoglycolate phosphatase (EC 3.1.3.18)                                          |
| 104. | scaffold11 size4199117_1860249_1861610;<br>scaffold11 size4199117_2081210_2082529                                                                                    | Central carbohydrate metabolism | Glycolate, glyoxylate interconversions     | Glycolate dehydrogenase (EC 1.1.99.14), iron-sulfur subunit GlcF                    |
| 105. | Scaffold10 size375231_47696_46707;<br>scaffold11 size4199117_1325554_1326519                                                                                         | Central carbohydrate metabolism | Glycolate, glyoxylate interconversions     | Hydroxypyruvate reductase (EC 1.1.1.81)                                             |
| 106. | scaffold11 size4199117_1861594_1863045                                                                                                                               | Central carbohydrate metabolism | Glycolate, glyoxylate interconversions     | Glycolate dehydrogenase (EC 1.1.99.14), subunit GlcD                                |
| 107. | Scaffold10 size375231_47696_46707;<br>scaffold11 size4199117_1325554_1326519                                                                                         | Central carbohydrate metabolism | Glycolate, glyoxylate interconversions     | Glyoxylate reductase (EC 1.1.1.79)                                                  |
| 108. | scaffold11 size4199117_1858923_1860248                                                                                                                               | Central carbohydrate metabolism | Glycolate, glyoxylate interconversions     | Glycolate dehydrogenase (EC 1.1.99.14), FAD-binding subunit GlcE                    |
| 109. | scaffold11 size4199117_3617107_3617844                                                                                                                               | Aminosugars                     | Chitin and N-acetylglucosamine utilization | Glucosamine-6-phosphate deaminase (EC 3.5.99.6)                                     |
| 110. | scaffold11 size4199117_3356729_3357976                                                                                                                               | Aminosugars                     | Chitin and N-acetylglucosamine utilization | N-Acetyl-D-glucosamine ABC transport system, sugar-binding protein                  |
| 111. | scaffold11 size4199117_3617902_3618627                                                                                                                               | Aminosugars                     | Chitin and N-acetylglucosamine utilization | Predicted transcriptional regulator of N-Acetylglucosamine utilization, GntR family |
| 112. | scaffold11 size4199117_3788814_3787921                                                                                                                               | Aminosugars                     | Chitin and N-acetylglucosamine utilization | N-acetylglucosamine kinase of eukaryotic type (EC 2.7.1.59)                         |



|      |                                                                                                                      |                          |                                                       |                                                                         |
|------|----------------------------------------------------------------------------------------------------------------------|--------------------------|-------------------------------------------------------|-------------------------------------------------------------------------|
| 113. | scaffold11 size4199117_3615591_3613714                                                                               | Aminosugars              | Chitin and N-acetylglucosamine utilization            | PTS system, N-acetylglucosamine-specific IIB component (EC 2.7.1.69)    |
| 114. | scaffold11 size4199117_3881849_3880971                                                                               | Aminosugars              | Chitin and N-acetylglucosamine utilization            | N-Acetyl-D-glucosamine ABC transport system, permease protein 2         |
| 115. | scaffold11 size4199117_3615591_3613714                                                                               | Aminosugars              | Chitin and N-acetylglucosamine utilization            | PTS system, N-acetylglucosamine-specific IIC component (EC 2.7.1.69)    |
| 116. | scaffold11 size4199117_2311174_2310293                                                                               | Aminosugars              | Chitin and N-acetylglucosamine utilization            | N-Acetyl-D-glucosamine ABC transport system, permease protein 1         |
| 117. | scaffold11 size4199117_3615920_3617104                                                                               | Aminosugars              | Chitin and N-acetylglucosamine utilization            | N-acetylglucosamine-6-phosphate deacetylase (EC 3.5.1.25)               |
| 118. | scaffold11 size4199117_1107965_1106736;<br>scaffold11 size4199117_3205412_3204171                                    | Di- and oligosaccharides | Sucrose utilization                                   | Sucrose permease, major facilitator superfamily                         |
| 119. | scaffold11 size4199117_1568315_1569388;<br>scaffold11 size4199117_3205739_3206722                                    | Di- and oligosaccharides | Sucrose utilization                                   | Sucrose operon repressor ScrR, LacI family                              |
| 120. | scaffold11 size4199117_877935_879314;<br>scaffold11 size4199117_1245896_1244496                                      | Di- and oligosaccharides | Sucrose utilization                                   | PTS system, sucrose-specific IIC component (EC 2.7.1.69)                |
| 121. | scaffold11 size4199117_877935_879314;<br>scaffold11 size4199117_1245896_1244496                                      | Di- and oligosaccharides | Sucrose utilization                                   | PTS system, sucrose-specific IIB component (EC 2.7.1.69)                |
| 122. | scaffold11 size4199117_2665525_2664587;<br>scaffold11 size4199117_3634936_3633959                                    | Di- and oligosaccharides | Sucrose utilization                                   | Fructokinase (EC 2.7.1.4)                                               |
| 123. | Scaffold4 size36871_13669_11444;<br>scaffold11 size4199117_1960685_1962007                                           | Di- and oligosaccharides | Fructooligosaccharides(FOS) and Raffinose Utilization | Alpha-galactosidase (EC 3.2.1.22)                                       |
| 124. | Scaffold8 size138119_9947_8658;<br>scaffold11 size4199117_1922773_1924056;<br>scaffold11 size4199117_1957547_1958806 | Di- and oligosaccharides | Fructooligosaccharides(FOS) and Raffinose Utilization | Multiple sugar ABC transporter, substrate-binding protein               |
| 125. | scaffold11 size4199117_1921875_1922702;<br>scaffold11 size4199117_1959828_1960658                                    | Di- and oligosaccharides | Fructooligosaccharides(FOS) and Raffinose Utilization | Multiple sugar ABC transporter, membrane-spanning permease protein MsmG |
| 126. | scaffold11 size4199117_1920913_1921875;<br>scaffold11 size4199117_1958896_1959828                                    | Di- and oligosaccharides | Fructooligosaccharides(FOS) and Raffinose Utilization | Multiple sugar ABC transporter, membrane-spanning permease protein MsmF |
| 127. | Scaffold8 size138119_53850_54959;<br>scaffold11 size4199117_3355601_3356692                                          | Di- and oligosaccharides | Fructooligosaccharides(FOS) and Raffinose Utilization | Multiple sugar ABC transporter, ATP-binding protein                     |
| 128. | scaffold11 size4199117_1956201_1957235                                                                               | Di- and oligosaccharides | Fructooligosaccharides(FOS) and Raffinose Utilization | MSM (multiple sugar metabolism) operon regulatory protein               |
| 129. | scaffold11 size4199117_3849017_3848301                                                                               | Di- and oligosaccharides | Trehalose Uptake and Utilization                      | Trehalose operon transcriptional repressor                              |
| 130. | scaffold11 size4199117_3491284_3489230                                                                               | Di- and oligosaccharides | Trehalose Uptake and Utilization                      | PTS system, glucose-specific IIB component (EC 2.7.1.69)                |
| 131. | scaffold11 size4199117_3852269_3850806                                                                               | Di- and oligosaccharides | Trehalose Uptake and                                  | PTS system, trehalose-specific IIC component (EC                        |

|      |                                                                                                                                                                                                         |                          |                                                           |                                                                       |
|------|---------------------------------------------------------------------------------------------------------------------------------------------------------------------------------------------------------|--------------------------|-----------------------------------------------------------|-----------------------------------------------------------------------|
|      |                                                                                                                                                                                                         |                          | Utilization                                               | 2.7.1.69)                                                             |
| 132. | scaffold11 size4199117_2333676_2332471                                                                                                                                                                  | Di- and oligosaccharides | Trehalose Uptake and Utilization                          | Glucose/mannose:H <sup>+</sup> symporter GlcP                         |
| 133. | Scaffold10 size375231_289145_288438                                                                                                                                                                     | Di- and oligosaccharides | Trehalose Uptake and Utilization                          | Beta-phosphoglucomutase (EC 5.4.2.6)                                  |
| 134. | scaffold11 size4199117_3850790_3849105                                                                                                                                                                  | Di- and oligosaccharides | Trehalose Uptake and Utilization                          | Trehalose-6-phosphate hydrolase (EC 3.2.1.93)                         |
| 135. | scaffold11 size4199117_876394_876891                                                                                                                                                                    | Di- and oligosaccharides | Trehalose Uptake and Utilization                          | PTS system, glucose-specific IIA component (EC 2.7.1.69)              |
| 136. | scaffold11 size4199117_3852269_3850806                                                                                                                                                                  | Di- and oligosaccharides | Trehalose Uptake and Utilization                          | PTS system, trehalose-specific IIB component (EC 2.7.1.69)            |
| 137. | scaffold11 size4199117_3679752_3678682;<br>scaffold11 size4199117_3763526_3762546;<br>scaffold11 size4199117_4125638_4124754;<br>scaffold13 size87933_43617_42649;<br>scaffold13 size87933_64047_65081; | Di- and oligosaccharides | Lactose and Galactose Uptake and Utilization              | UDP-glucose 4-epimerase (EC 5.1.3.2)                                  |
| 138. | scaffold11 size4199117_2560151_2563255                                                                                                                                                                  | Di- and oligosaccharides | Lactose and Galactose Uptake and Utilization              | Beta-galactosidase (EC 3.2.1.23)                                      |
| 139. | scaffold11 size4199117_3531550_3532317;<br>scaffold11 size4199117_4129611_4128088                                                                                                                       | Di- and oligosaccharides | Lactose and Galactose Uptake and Utilization              | Galactose-1-phosphate uridylyltransferase (EC 2.7.7.10)               |
| 140. | scaffold11 size4199117_4130820_4129642                                                                                                                                                                  | Di- and oligosaccharides | Lactose and Galactose Uptake and Utilization              | Galactokinase (EC 2.7.1.6)                                            |
| 141. | scaffold11 size4199117_2891541_2890486                                                                                                                                                                  | Di- and oligosaccharides | Lactose and Galactose Uptake and Utilization              | Aldose 1-epimerase (EC 5.1.3.3)                                       |
| 142. | scaffold11 size4199117_3254631_3254266;<br>scaffold11 size4199117_3917986_3918351                                                                                                                       | One-carbon Metabolism    | Formaldehyde assimilation: Ribulose monophosphate pathway | Transcriptional regulator HxIR, formaldehyde assimilation             |
| 143. | scaffold11 size4199117_1789326_1789874;<br>scaffold11 size4199117_3919260_3919817                                                                                                                       | One-carbon Metabolism    | Formaldehyde assimilation: Ribulose monophosphate pathway | 6-phospho-3-hexuloisomerase                                           |
| 144. | scaffold11 size4199117_1728909_1730159                                                                                                                                                                  | One-carbon Metabolism    | Serine-glyoxylate cycle                                   | Serine--pyruvate aminotransferase (EC 2.6.1.51)                       |
| 145. | Scaffold10 size375231_231045_229801                                                                                                                                                                     | One-carbon Metabolism    | Serine-glyoxylate cycle                                   | Serine hydroxymethyltransferase (EC 2.1.2.1)                          |
| 146. | scaffold11 size4199117_487525_488193;<br>scaffold11 size4199117_2347840_2347178                                                                                                                         | One-carbon Metabolism    | Serine-glyoxylate cycle                                   | Succinyl-CoA:3-ketoacid-coenzyme A transferase subunit B (EC 2.8.3.5) |
| 147. | scaffold11 size4199117_3563730_3562987                                                                                                                                                                  | One-carbon Metabolism    | Serine-glyoxylate cycle                                   | Acetoacetyl-CoA reductase (EC 1.1.1.36)                               |
| 148. | scaffold11 size4199117_486815_487504;<br>scaffold11 size4199117_2348498_2347842                                                                                                                         | One-carbon Metabolism    | Serine-glyoxylate cycle                                   | Succinyl-CoA:3-ketoacid-coenzyme A transferase subunit A (EC 2.8.3.5) |

|      |                                                                                                                                                                  |                       |                                             |                                                                             |
|------|------------------------------------------------------------------------------------------------------------------------------------------------------------------|-----------------------|---------------------------------------------|-----------------------------------------------------------------------------|
| 149. | scaffold11 size4199117_3564411_3563812                                                                                                                           | One-carbon Metabolism | Serine-glyoxylate cycle                     | polyhydroxyalkanoate synthesis repressor PhaR                               |
| 150. | scaffold11 size4199117_464754_466304                                                                                                                             | One-carbon Metabolism | Serine-glyoxylate cycle                     | Propionyl-CoA carboxylase beta chain (EC 6.4.1.3)                           |
| 151. | Scaffold10 size375231_251983_248741;<br>scaffold11 size4199117_453969_456005;<br>scaffold11 size4199117_455998_458148                                            | One-carbon Metabolism | Serine-glyoxylate cycle                     | Methylmalonyl-CoA mutase (EC 5.4.99.2)                                      |
| 152. | scaffold11 size4199117_3498398_3500236                                                                                                                           | One-carbon Metabolism | Serine-glyoxylate cycle                     | 5,10-methylenetetrahydrofolate reductase (EC 1.5.1.20)                      |
| 153. | scaffold11 size4199117_2625573_2624719                                                                                                                           | One-carbon Metabolism | Serine-glyoxylate cycle                     | Methenyltetrahydrofolate cyclohydrolase (EC 3.5.4.9)                        |
| 154. | scaffold11 size4199117_2768475_2766787                                                                                                                           | One-carbon Metabolism | Serine-glyoxylate cycle                     | Formate--tetrahydrofolate ligase (EC 6.3.4.3)                               |
| 155. | scaffold11 size4199117_588180_589721                                                                                                                             | One-carbon Metabolism | Serine-glyoxylate cycle                     | Methylcrotonyl-CoA carboxylase carboxyl transferase subunit (EC 6.4.1.4)    |
| 156. | scaffold11 size4199117_391136_391702                                                                                                                             | One-carbon Metabolism | Serine-glyoxylate cycle                     | 5-formyltetrahydrofolate cyclo-ligase (EC 6.3.3.2)                          |
| 157. | scaffold11 size4199117_2625573_2624719                                                                                                                           | One-carbon Metabolism | Serine-glyoxylate cycle                     | Methylenetetrahydrofolate dehydrogenase (NADP+) (EC 1.5.1.5)                |
| 158. | scaffold11 size4199117_970388_969870                                                                                                                             | One-carbon Metabolism | Serine-glyoxylate cycle                     | cytosolic long-chain acyl-CoA thioester hydrolase family protein            |
| 159. | Scaffold10 size375231_72917_71739;<br>scaffold11 size4199117_485389_486576;<br>scaffold11 size4199117_2224633_2223533;<br>scaffold11 size4199117_2347178_2345988 | One-carbon Metabolism | Serine-glyoxylate cycle                     | Acetyl-CoA acetyltransferase (EC 2.3.1.9)                                   |
| 160. | Scaffold10 size375231_72917_71739;<br>scaffold11 size4199117_485389_486576;<br>scaffold11 size4199117_2224633_2223533;<br>scaffold11 size4199117_2347178_2345988 | One-carbon Metabolism | Serine-glyoxylate cycle                     | 3-ketoacyl-CoA thiolase (EC 2.3.1.16)                                       |
| 161. | scaffold11 size4199117_1387191_1387922                                                                                                                           | One-carbon Metabolism | Serine-glyoxylate cycle                     | Glycerate kinase (EC 2.7.1.31)                                              |
| 162. | scaffold11 size4199117_837040_837942                                                                                                                             | One-carbon Metabolism | One-carbon metabolism by tetrahydropterines | Formyltetrahydrofolate deformylase (EC 3.5.1.10)                            |
| 163. | scaffold11 size4199117_2019404_2020282;<br>scaffold11 size4199117_3647334_3646432;<br>scaffold11 size4199117_4127161_4128045                                     | Organic acids         | Glycerate metabolism                        | 2-hydroxy-3-oxopropionate reductase (EC 1.1.1.60)                           |
| 164. | scaffold11 size4199117_1950543_1951811                                                                                                                           | Organic acids         | Glycerate metabolism                        | D-glycerate transporter (predicted)                                         |
| 165. | scaffold11 size4199117_2785133_2784078                                                                                                                           | Organic acids         | Glycerate metabolism                        | Tartrate decarboxylase (EC 4.1.1.73)                                        |
| 166. | scaffold11 size4199117_3552861_3551422                                                                                                                           | Organic acids         | Lactate utilization                         | Predicted L-lactate dehydrogenase, Iron-sulfur cluster-binding subunit YkgF |

|      |                                                                                                                                                                                                                                                                                                                                                                                                                                                                          |               |                           |                                                                      |
|------|--------------------------------------------------------------------------------------------------------------------------------------------------------------------------------------------------------------------------------------------------------------------------------------------------------------------------------------------------------------------------------------------------------------------------------------------------------------------------|---------------|---------------------------|----------------------------------------------------------------------|
| 167. | Scaffold8 size138119_90632_92206;<br>scaffold11 size4199117_1858540_1856840                                                                                                                                                                                                                                                                                                                                                                                              | Organic acids | Lactate utilization       | L-lactate permease                                                   |
| 168. | scaffold11 size4199117_3551444_3550731                                                                                                                                                                                                                                                                                                                                                                                                                                   | Organic acids | Lactate utilization       | Predicted L-lactate dehydrogenase, hypothetical protein subunit YkgG |
| 169. | scaffold11 size4199117_3553601_3552879                                                                                                                                                                                                                                                                                                                                                                                                                                   | Organic acids | Lactate utilization       | Predicted L-lactate dehydrogenase, Fe-S oxidoreductase subunit YkgE  |
| 170. | scaffold11 size4199117_3557319_3556600                                                                                                                                                                                                                                                                                                                                                                                                                                   | Organic acids | Lactate utilization       | Lactate-responsive regulator LldR in Firmicutes, GntR family         |
| 171. | scaffold11 size4199117_4012406_4011540                                                                                                                                                                                                                                                                                                                                                                                                                                   | Organic acids | Malonate decarboxylase    | Triphosphoribosyl-dephospho-CoA synthetase (EC 2.7.8.25)             |
| 172. | scaffold11 size4199117_4099269_4098508                                                                                                                                                                                                                                                                                                                                                                                                                                   | Organic acids | Malonate decarboxylase    | Malonate transporter, MadM subunit                                   |
| 173. | scaffold11 size4199117_4009539_4008931                                                                                                                                                                                                                                                                                                                                                                                                                                   | Organic acids | Malonate decarboxylase    | Phosphoribosyl-dephospho-CoA transferase (EC 2.7.7.-)                |
| 174. | scaffold11 size4199117_4011516_4011214                                                                                                                                                                                                                                                                                                                                                                                                                                   | Organic acids | Malonate decarboxylase    | Malonate decarboxylase delta subunit                                 |
| 175. | scaffold11 size4199117_4011227_4009527                                                                                                                                                                                                                                                                                                                                                                                                                                   | Organic acids | Malonate decarboxylase    | Malonate decarboxylase beta subunit                                  |
| 176. | scaffold11 size4199117_4015028_4014102                                                                                                                                                                                                                                                                                                                                                                                                                                   | Organic acids | Malonate decarboxylase    | Malonyl CoA acyl carrier protein transacylase (EC 2.3.1.39)          |
| 177. | scaffold11 size4199117_4099679_4099266                                                                                                                                                                                                                                                                                                                                                                                                                                   | Organic acids | Malonate decarboxylase    | Malonate transporter, MadL subunit                                   |
| 178. | scaffold11 size4199117_4014064_4012412                                                                                                                                                                                                                                                                                                                                                                                                                                   | Organic acids | Malonate decarboxylase    | Malonate decarboxylase alpha subunit                                 |
| 179. | scaffold11 size4199117_4011227_4009527                                                                                                                                                                                                                                                                                                                                                                                                                                   | Organic acids | Malonate decarboxylase    | Malonate decarboxylase gamma subunit                                 |
| 180. | scaffold11 size4199117_4021613_4022326                                                                                                                                                                                                                                                                                                                                                                                                                                   | Organic acids | Alpha-acetolactate operon | Alpha-acetolactate decarboxylase (EC 4.1.1.5)                        |
| 181. | scaffold11 size4199117_4019917_4021596                                                                                                                                                                                                                                                                                                                                                                                                                                   | Organic acids | Alpha-acetolactate operon | Acetolactate synthase, catabolic (EC 2.2.1.6)                        |
| 182. | Scaffold8 size138119_68809_69804;<br>Scaffold8 size138119_93296_92304;<br>scaffold11 size4199117_1148717_1149919;<br>scaffold11 size4199117_1193388_1194917;<br>scaffold11 size4199117_1233453_1234493;<br>scaffold11 size4199117_1367241_1366180;<br>scaffold11 size4199117_1949157_1947973;<br>scaffold11 size4199117_2074581_2075771;<br>scaffold11 size4199117_2473009_2471822;<br>scaffold11 size4199117_2474207_2473038;<br>scaffold11 size4199117_3908075_3907092 | Fermentation  | Butanol Biosynthesis      | Alcohol dehydrogenase (EC 1.1.1.1)                                   |
| 183. | Scaffold10 size375231_21251_20088;<br>scaffold11 size4199117_1911492_1912664;<br>scaffold11 size4199117_2335029_2333857                                                                                                                                                                                                                                                                                                                                                  | Fermentation  | Butanol Biosynthesis      | NADH-dependent butanol dehydrogenase A (EC 1.1.1.-)                  |

|      |                                                                                                                                                                                                                                            |              |                                       |                                                                                             |
|------|--------------------------------------------------------------------------------------------------------------------------------------------------------------------------------------------------------------------------------------------|--------------|---------------------------------------|---------------------------------------------------------------------------------------------|
| 184. | Scaffold8 size138119_1254_478;<br>Scaffold8 size138119_42290_41487;<br>scaffold11 size4199117_174389_175162;<br>scaffold11 size4199117_584185_584952;<br>scaffold11 size4199117_2352356_2351583;<br>scaffold11 size4199117_2357944_2357162 | Fermentation | Butanol Biosynthesis                  | Enoyl-CoA hydratase (EC 4.2.1.17)                                                           |
| 185. | Scaffold10 size375231_255791_254937;<br>scaffold11 size4199117_2358825_2357941                                                                                                                                                             | Fermentation | Butanol Biosynthesis                  | 3-hydroxybutyryl-CoA dehydrogenase (EC 1.1.1.157)                                           |
| 186. | scaffold11 size4199117_204286_206004;<br>scaffold11 size4199117_3077198_3075603;<br>scaffold11 size4199117_3855293_3853536                                                                                                                 | Fermentation | Acetolactate synthase subunits        | Acetolactate synthase large subunit (EC 2.2.1.6)                                            |
| 187. | scaffold11 size4199117_206001_206513                                                                                                                                                                                                       | Fermentation | Acetolactate synthase subunits        | Acetolactate synthase small subunit (EC 2.2.1.6)                                            |
| 188. | Scaffold8 size138119_89607_90563                                                                                                                                                                                                           | Fermentation | Fermentations: Lactate                | L-lactate dehydrogenase (EC 1.1.1.27)                                                       |
| 189. | scaffold11 size4199117_2904407_2902995                                                                                                                                                                                                     | Fermentation | Acetyl-CoA fermentation to Butyrate   | Acetoacetate metabolism regulatory protein AtoC                                             |
| 190. | scaffold11 size4199117_1005746_1006261                                                                                                                                                                                                     | Fermentation | Acetyl-CoA fermentation to Butyrate   | 3-hydroxybutyryl-CoA dehydratase (EC 4.2.1.55)                                              |
| 191. | scaffold11 size4199117_447991_449076                                                                                                                                                                                                       | Fermentation | Acetyl-CoA fermentation to Butyrate   | Butyrate kinase (EC 2.7.2.7)                                                                |
| 192. | scaffold11 size4199117_175988_176968                                                                                                                                                                                                       | Fermentation | Acetyl-CoA fermentation to Butyrate   | Electron transfer flavoprotein, alpha subunit                                               |
| 193. | scaffold11 size4199117_856089_856751                                                                                                                                                                                                       | Fermentation | Acetyl-CoA fermentation to Butyrate   | Acetyl-CoA:acetoacetyl-CoA transferase, beta subunit (EC 2.8.3.8)                           |
| 194. | scaffold11 size4199117_175181_175954                                                                                                                                                                                                       | Fermentation | Acetyl-CoA fermentation to Butyrate   | Electron transfer flavoprotein, beta subunit                                                |
| 195. | Scaffold10 size375231_75308_72930;<br>scaffold11 size4199117_2358825_2357941                                                                                                                                                               | Fermentation | Acetyl-CoA fermentation to Butyrate   | 3-hydroxyacyl-CoA dehydrogenase (EC 1.1.1.35)                                               |
| 196. | scaffold11 size4199117_855403_856104                                                                                                                                                                                                       | Fermentation | Acetyl-CoA fermentation to Butyrate   | Acetyl-CoA:acetoacetyl-CoA transferase, alpha subunit (EC 2.8.3.8)                          |
| 197. | scaffold11 size4199117_1420874_1419828                                                                                                                                                                                                     | Fermentation | Acetoin, butanediol metabolism        | 2,3-butanediol dehydrogenase, R-alcohol forming, (R)- and (S)-acetoin-specific (EC 1.1.1.4) |
| 198. | scaffold11 size4199117_2856414_2854537                                                                                                                                                                                                     | Fermentation | Acetoin, butanediol metabolism        | Transcriptional activator of acetoin dehydrogenase operon AcoR                              |
| 199. | Scaffold10 size375231_322258_320825                                                                                                                                                                                                        | CO2 fixation | Photorespiration (oxidative C2 cycle) | 2-oxoglutarate/malate translocator                                                          |
| 200. | scaffold11 size4199117_408627_410105                                                                                                                                                                                                       | CO2 fixation | Photorespiration (oxidative C2 cycle) | Glycine dehydrogenase [decarboxylating] (glycine cleavage system P2 protein) (EC 1.4.4.2)   |

|      |                                                                                                                   |                |                                                          |                                                                                                       |
|------|-------------------------------------------------------------------------------------------------------------------|----------------|----------------------------------------------------------|-------------------------------------------------------------------------------------------------------|
| 201. | scaffold11 size4199117_407288_408634                                                                              | CO2 fixation   | Photorespiration (oxidative C2 cycle)                    | Glycine dehydrogenase [decarboxylating] (glycine cleavage system P1 protein) (EC 1.4.4.2)             |
| 202. | Scaffold10 size375231_69323_68940                                                                                 | CO2 fixation   | Photorespiration (oxidative C2 cycle)                    | Glycine cleavage system H protein                                                                     |
| 203. | Scaffold10 size375231_317129_318589                                                                               | CO2 fixation   | Photorespiration (oxidative C2 cycle)                    | Catalase (EC 1.11.1.6)                                                                                |
| 204. | scaffold11 size4199117_406167_407267                                                                              | CO2 fixation   | Photorespiration (oxidative C2 cycle)                    | Aminomethyltransferase (glycine cleavage system T protein) (EC 2.1.2.10)                              |
| 205. | Scaffold4 size36871_7415_6603                                                                                     | Sugar alcohols | Glycerol and Glycerol-3-phosphate Uptake and Utilization | Glycerol-3-phosphate ABC transporter, permease protein UgpE (TC 3.A.1.1.3)                            |
| 206. | scaffold11 size4199117_884985_884167                                                                              | Sugar alcohols | Glycerol and Glycerol-3-phosphate Uptake and Utilization | Glycerophosphoryl diester phosphodiesterase, periplasmic (EC 3.1.4.46)                                |
| 207. | scaffold11 size4199117_545743_546774                                                                              | Sugar alcohols | Glycerol and Glycerol-3-phosphate Uptake and Utilization | Glycerol-3-phosphate dehydrogenase [NAD(P)+] (EC 1.1.1.94)                                            |
| 208. | Scaffold4 size36871_8347_7412                                                                                     | Sugar alcohols | Glycerol and Glycerol-3-phosphate Uptake and Utilization | Glycerol-3-phosphate ABC transporter, permease protein UgpA (TC 3.A.1.1.3)                            |
| 209. | Scaffold8 size138119_78914_77424                                                                                  | Sugar alcohols | Glycerol and Glycerol-3-phosphate Uptake and Utilization | Glycerol kinase (EC 2.7.1.30)                                                                         |
| 210. | Scaffold5 size51851_12994_13596                                                                                   | Sugar alcohols | Glycerol and Glycerol-3-phosphate Uptake and Utilization | GlpG protein (membrane protein of glp regulon)                                                        |
| 211. | Scaffold4 size36871_6589_5249                                                                                     | Sugar alcohols | Glycerol and Glycerol-3-phosphate Uptake and Utilization | Glycerol-3-phosphate ABC transporter, periplasmic glycerol-3-phosphate-binding protein (TC 3.A.1.1.3) |
| 212. | Scaffold4 size36871_5162_4425;<br>scaffold11 size4199117_442396_443124;<br>scaffold11 size4199117_2059950_2059075 | Sugar alcohols | Glycerol and Glycerol-3-phosphate Uptake and Utilization | Glycerophosphoryl diester phosphodiesterase (EC 3.1.4.46)                                             |
| 213. | Scaffold8 size138119_77237_75558                                                                                  | Sugar alcohols | Glycerol and Glycerol-3-phosphate Uptake and Utilization | Aerobic glycerol-3-phosphate dehydrogenase (EC 1.1.5.3)                                               |
| 214. | Scaffold8 size138119_79808_78981                                                                                  | Sugar alcohols | Glycerol and Glycerol-3-phosphate Uptake and Utilization | Glycerol uptake facilitator protein                                                                   |

|      |                                                                                                                                                                                                  |                |                                                          |                                                                               |
|------|--------------------------------------------------------------------------------------------------------------------------------------------------------------------------------------------------|----------------|----------------------------------------------------------|-------------------------------------------------------------------------------|
| 215. | Scaffold4 size36871_9459_8344                                                                                                                                                                    | Sugar alcohols | Glycerol and Glycerol-3-phosphate Uptake and Utilization | Glycerol-3-phosphate ABC transporter, ATP-binding protein UgpC (TC 3.A.1.1.3) |
| 216. | scaffold11 size4199117_3488945_3487224                                                                                                                                                           | Sugar alcohols | Mannitol Utilization                                     | Phosphoenolpyruvate-protein phosphotransferase of PTS system (EC 2.7.3.9)     |
| 217. | Scaffold5 size51851_36820_34730                                                                                                                                                                  | Sugar alcohols | Mannitol Utilization                                     | Mannitol operon activator, BglG family                                        |
| 218. | Scaffold5 size51851_38773_36881                                                                                                                                                                  | Sugar alcohols | Mannitol Utilization                                     | PTS system, mannitol-specific IIC component (EC 2.7.1.69)                     |
| 219. | Scaffold5 size51851_34724_33582                                                                                                                                                                  | Sugar alcohols | Mannitol Utilization                                     | Mannitol-1-phosphate 5-dehydrogenase (EC 1.1.1.17)                            |
| 220. | Scaffold5 size51851_38773_36881                                                                                                                                                                  | Sugar alcohols | Mannitol Utilization                                     | PTS system, mannitol-specific IIB component (EC 2.7.1.69)                     |
| 221. | Scaffold8 size138119_122069_121047                                                                                                                                                               | Sugar alcohols | Inositol catabolism                                      | Myo-inositol 2-dehydrogenase 1 (EC 1.1.1.18)                                  |
| 222. | scaffold11 size4199117_1369552_1370970;<br>scaffold12 size137365_81124_82467;<br>scaffold12 size137365_97205_98629                                                                               | Sugar alcohols | Inositol catabolism                                      | Major myo-inositol transporter IolT                                           |
| 223. | Scaffold8 size138119_115331_114336;<br>Scaffold8 size138119_124842_123838;<br>scaffold11 size4199117_1383436_1384485;<br>scaffold12 size137365_77254_78261;<br>scaffold12 size137365_98819_99814 | Sugar alcohols | Inositol catabolism                                      | Predicted transcriptional regulator of the myo-inositol catabolic operon      |
| 224. | scaffold11 size4199117_1382302_1383183                                                                                                                                                           | Sugar alcohols | Inositol catabolism                                      | Glyceraldehyde-3-phosphate ketol-isomerase (EC 5.3.1.1)                       |
| 225. | scaffold11 size4199117_1373115_1373870                                                                                                                                                           | Sugar alcohols | Inositol catabolism                                      | Transcriptional repressor of the myo-inositol catabolic operon DeoR family    |
| 226. | Scaffold8 size138119_116288_115392;<br>scaffold11 size4199117_1368638_1369531;<br>scaffold11 size4199117_3880777_3880043                                                                         | Sugar alcohols | Inositol catabolism                                      | Inosose dehydratase (EC 4.2.1.44)                                             |
| 227. | scaffold11 size4199117_1370993_1371850;<br>scaffold11 size4199117_2580502_2579534                                                                                                                | Sugar alcohols | Inositol catabolism                                      | Inosose isomerase (EC 5.3.99.-)                                               |
| 228. | Scaffold8 size138119_119877_118420;<br>scaffold11 size4199117_1378353_1379810                                                                                                                    | Sugar alcohols | Inositol catabolism                                      | Methylmalonate-semialdehyde dehydrogenase [inositol] (EC 1.2.1.27)            |
| 229. | scaffold11 size4199117_1381175_1382212;<br>scaffold11 size4199117_2582546_2581521;<br>scaffold12 size137365_79064_80083;<br>scaffold12 size137365_95974_97026                                    | Sugar alcohols | Inositol catabolism                                      | Myo-inositol 2-dehydrogenase (EC 1.1.1.18)                                    |
| 230. | Scaffold8 size138119_114171_113383;                                                                                                                                                              | Sugar alcohols | Inositol catabolism                                      | 5-deoxy-glucuronate isomerase (EC 5.3.1.-)                                    |

|      |                                                                                                                     |                                |                                      |                                                                                    |
|------|---------------------------------------------------------------------------------------------------------------------|--------------------------------|--------------------------------------|------------------------------------------------------------------------------------|
|      | scaffold11 size4199117_1376487_1377305                                                                              |                                |                                      |                                                                                    |
| 231. | Scaffold8 size138119_120970_119963;<br>scaffold11 size4199117_1377321_1378328                                       | Sugar alcohols                 | Inositol catabolism                  | 5-keto-2-deoxygluconokinase (EC 2.7.1.92)                                          |
| 232. | Scaffold8 size138119_118307_116373;<br>scaffold11 size4199117_1374470_1376392                                       | Sugar alcohols                 | Inositol catabolism                  | Epi-inositol hydrolase (EC 3.7.1.-)                                                |
| 233. | Scaffold10 size375231_181271_180849                                                                                 | Carbohydrates - no subcategory | Carbon storage regulator             | Flagellar assembly factor FliW                                                     |
| 234. | Scaffold10 size375231_180824_180594                                                                                 | Carbohydrates - no subcategory | Carbon storage regulator             | Carbon storage regulator                                                           |
| 235. | scaffold11 size4199117_2474_3625                                                                                    | Polysaccharides                | Glycogen metabolism                  | Glucose-1-phosphate adenylyltransferase (EC 2.7.7.27)                              |
| 236. | scaffold11 size4199117_562_2523                                                                                     | Polysaccharides                | Glycogen metabolism                  | 1,4-alpha-glucan (glycogen) branching enzyme, GH-13-type (EC 2.4.1.18)             |
| 237. | scaffold11 size4199117_3648_4673                                                                                    | Polysaccharides                | Glycogen metabolism                  | Glycogen biosynthesis protein GlgD, glucose-1-phosphate adenylyltransferase family |
| 238. | scaffold11 size4199117_6114_8525                                                                                    | Polysaccharides                | Glycogen metabolism                  | Glycogen phosphorylase (EC 2.4.1.1)                                                |
| 239. | scaffold11 size4199117_63000_65141                                                                                  | Polysaccharides                | Glycogen metabolism                  | Glycogen debranching enzyme (EC 3.2.1.-)                                           |
| 240. | scaffold11 size4199117_386104_388422                                                                                | Polysaccharides                | Glycogen metabolism                  | Glycogen branching enzyme, GH-57-type, archaeal (EC 2.4.1.18)                      |
| 241. | scaffold11 size4199117_4670_6100                                                                                    | Polysaccharides                | Glycogen metabolism                  | Glycogen synthase, ADP-glucose transglucosylase (EC 2.4.1.21)                      |
| 242. | Scaffold10 size375231_310969_310193                                                                                 | Polysaccharides                | Alpha-Amylase locus in Streptococcus | putative esterase                                                                  |
| 243. | scaffold11 size4199117_2312476_2311190                                                                              | Polysaccharides                | Alpha-Amylase locus in Streptococcus | Maltose/maltodextrin ABC transporter, substrate binding periplasmic protein MalE   |
| 244. | Scaffold8 size138119_75393_73639<br>scaffold11 size4199117_388419_390698;<br>scaffold11 size4199117_3693806_3692082 | Monosaccharides                | Mannose Metabolism                   | Phosphomannomutase (EC 5.4.2.8)                                                    |
| 245. | scaffold11 size4199117_3195075_3194581                                                                              | Monosaccharides                | Mannose Metabolism                   | PTS system, mannose-specific IIB component (EC 2.7.1.69)                           |
| 246. | scaffold11 size4199117_1353530_1352319                                                                              | Monosaccharides                | Mannose Metabolism                   | D-mannose isomerase (EC 5.3.1.7)                                                   |
| 247. | scaffold11 size4199117_3195075_3194581                                                                              | Monosaccharides                | Mannose Metabolism                   | PTS system, mannose-specific IIA component (EC 2.7.1.69)                           |
| 248. | scaffold11 size4199117_942354_942713                                                                                | Monosaccharides                | Mannose Metabolism                   | Mannose-6-phosphate isomerase (EC 5.3.1.8)                                         |
| 249. | scaffold11 size4199117_388419_390698                                                                                | Monosaccharides                | Mannose Metabolism                   | Mannose-1-phosphate guanylyltransferase (EC 2.7.7.13 )                             |



|      |                                                                                                                          |                 |                                                             |                                                                   |
|------|--------------------------------------------------------------------------------------------------------------------------|-----------------|-------------------------------------------------------------|-------------------------------------------------------------------|
| 250. | scaffold11 size4199117_1783823_1784566                                                                                   | Monosaccharides | 2-Ketogluconate Utilization                                 | Epimerase KguE                                                    |
| 251. | scaffold11 size4199117_1785525_1786805                                                                                   | Monosaccharides | 2-Ketogluconate Utilization                                 | 2-ketogluconate transporter                                       |
| 252. | scaffold11 size4199117_1787578_1788588                                                                                   | Monosaccharides | 2-Ketogluconate Utilization                                 | 2-ketogluconate utilization repressor PtxS                        |
| 253. | scaffold11 size4199117_1784563_1785522                                                                                   | Monosaccharides | 2-Ketogluconate Utilization                                 | 2-ketogluconate kinase (EC 2.7.1.13)                              |
| 254. | scaffold11 size4199117_3891555_3890677                                                                                   | Monosaccharides | Deoxyribose and Deoxynucleoside Catabolism                  | Ribokinase (EC 2.7.1.15)                                          |
| 255. | scaffold11 size4199117_493271_494452                                                                                     | Monosaccharides | Deoxyribose and Deoxynucleoside Catabolism                  | Phosphopentomutase (EC 5.4.2.7)                                   |
| 256. | scaffold11 size4199117_1933618_1934919                                                                                   | Monosaccharides | Deoxyribose and Deoxynucleoside Catabolism                  | Pyrimidine-nucleoside phosphorylase (EC 2.4.2.2)                  |
| 257. | scaffold11 size4199117_494469_495299;<br>scaffold11 size4199117_869616_870320;<br>scaffold11 size4199117_2141505_2141963 | Monosaccharides | Deoxyribose and Deoxynucleoside Catabolism                  | Purine nucleoside phosphorylase (EC 2.4.2.1)                      |
| 258. | scaffold11 size4199117_1932156_1933106                                                                                   | Monosaccharides | Deoxyribose and Deoxynucleoside Catabolism                  | Deoxyribonucleoside regulator DeoR (transcriptional repressor)    |
| 259. | scaffold11 size4199117_1081250_1082782                                                                                   | Monosaccharides | Deoxyribose and Deoxynucleoside Catabolism                  | Predicted nucleoside ABC transporter, ATP-binding component       |
| 260. | scaffold11 size4199117_1934941_1935615                                                                                   | Monosaccharides | Deoxyribose and Deoxynucleoside Catabolism                  | Deoxyribose-phosphate aldolase (EC 4.1.2.4)                       |
| 261. | scaffold11 size4199117_1080158_1081168                                                                                   | Monosaccharides | Deoxyribose and Deoxynucleoside Catabolism                  | Predicted nucleoside ABC transporter, substrate-binding component |
| 262. | scaffold11 size4199117_3644889_3643531                                                                                   | Monosaccharides | D-gluconate and ketogluconates metabolism                   | Gluconate transporter family protein                              |
| 263. | scaffold11 size4199117_4061465_4060137                                                                                   | Monosaccharides | D-gluconate and ketogluconates metabolism                   | Gluconate permease                                                |
| 264. | scaffold11 size4199117_2599946_2598075                                                                                   | Monosaccharides | Fructose utilization                                        | PTS system, fructose-specific IIB component (EC 2.7.1.69)         |
| 265. | scaffold11 size4199117_2599946_2598075                                                                                   | Monosaccharides | Fructose utilization                                        | PTS system, fructose-specific IIA component (EC 2.7.1.69)         |
| 266. | scaffold11 size4199117_2599946_2598075                                                                                   | Monosaccharides | Fructose utilization                                        | PTS system, fructose-specific IIC component (EC 2.7.1.69)         |
| 267. | scaffold11 size4199117_58324_58103;<br>scaffold11 size4199117_2601622_2600870                                            | Monosaccharides | Fructose utilization                                        | Transcriptional repressor of the fructose operon, DeoR family     |
| 268. | scaffold11 size4199117_2600873_2599959                                                                                   | Monosaccharides | Fructose utilization                                        | 1-phosphofructokinase (EC 2.7.1.56)                               |
| 269. | scaffold11 size4199117_2837495_2836791                                                                                   | Monosaccharides | D-galactarate, D-glucarate and D-glycerate catabolism - gjo | Predicted 5-dehydro-4-deoxyglucarate regulator YcbG               |

|      |                                                                                   |                 |                                                             |                                                                                     |
|------|-----------------------------------------------------------------------------------|-----------------|-------------------------------------------------------------|-------------------------------------------------------------------------------------|
| 270. | scaffold11 size4199117_2840503_2839124                                            | Monosaccharides | D-galactarate, D-glucarate and D-glycerate catabolism - gjo | D-glucarate permease                                                                |
| 271. | scaffold11 size4199117_2839087_2837714                                            | Monosaccharides | D-galactarate, D-glucarate and D-glycerate catabolism - gjo | Glucarate dehydratase (EC 4.2.1.40)                                                 |
| 272. | scaffold11 size4199117_1949316_1950416                                            | Monosaccharides | D-galactarate, D-glucarate and D-glycerate catabolism - gjo | Sugar diacid utilization regulator SdaR                                             |
| 273. | scaffold11 size4199117_2845345_2846880                                            | Monosaccharides | D-galactarate, D-glucarate and D-glycerate catabolism - gjo | D-galactarate dehydratase (EC 4.2.1.42)                                             |
| 274. | scaffold11 size4199117_2843055_2842123                                            | Monosaccharides | D-galactarate, D-glucarate and D-glycerate catabolism - gjo | 5-dehydro-4-deoxyglucarate dehydratase (EC 4.2.1.41)                                |
| 275. | scaffold11 size4199117_1866332_1867126                                            | Monosaccharides | D-Galacturonate and D-Glucuronate Utilization               | Transcriptional regulator KdgR, KDG operon repressor                                |
| 276. | scaffold11 size4199117_1109579_1111288;<br>scaffold11 size4199117_3363625_3361958 | Monosaccharides | D-Galacturonate and D-Glucuronate Utilization               | Alpha-glucosidase (EC 3.2.1.20)                                                     |
| 277. | scaffold11 size4199117_2825960_2824497                                            | Monosaccharides | D-Galacturonate and D-Glucuronate Utilization               | Altronate oxidoreductase (EC 1.1.1.58)                                              |
| 278. | scaffold11 size4199117_2822951_2821554                                            | Monosaccharides | D-Galacturonate and D-Glucuronate Utilization               | Polygalacturonase (EC 3.2.1.15)                                                     |
| 279. | scaffold11 size4199117_1903725_1904486                                            | Monosaccharides | D-Galacturonate and D-Glucuronate Utilization               | 2-deoxy-D-gluconate 3-dehydrogenase (EC 1.1.1.125)                                  |
| 280. | scaffold11 size4199117_2828575_2827193                                            | Monosaccharides | D-Galacturonate and D-Glucuronate Utilization               | Glucuronide transporter UidB                                                        |
| 281. | scaffold11 size4199117_2830044_2828623                                            | Monosaccharides | D-Galacturonate and D-Glucuronate Utilization               | Uronate isomerase (EC 5.3.1.12)                                                     |
| 282. | scaffold11 size4199117_2827090_2826077                                            | Monosaccharides | D-Galacturonate and D-Glucuronate Utilization               | Hexuronate utilization operon transcriptional repressor ExuR                        |
| 283. | scaffold11 size4199117_3538032_3536527;<br>scaffold11 size4199117_3890272_3888791 | Monosaccharides | D-ribose utilization                                        | Ribose ABC transport system, ATP-binding protein RbsA (TC 3.A.1.2.1)                |
| 284. | scaffold11 size4199117_2584425_2583394;<br>scaffold11 size4199117_3892537_3891548 | Monosaccharides | D-ribose utilization                                        | Ribose operon repressor                                                             |
| 285. | scaffold11 size4199117_3536530_3535496;<br>scaffold11 size4199117_3888789_3887830 | Monosaccharides | D-ribose utilization                                        | Ribose ABC transport system, permease protein RbsC (TC 3.A.1.2.1)                   |
| 286. | scaffold11 size4199117_3887818_3886898                                            | Monosaccharides | D-ribose utilization                                        | Ribose ABC transport system, periplasmic ribose-binding protein RbsB (TC 3.A.1.2.1) |
| 287. | scaffold11 size4199117_3890676_3890287                                            | Monosaccharides | D-ribose utilization                                        | Ribose ABC transport system, high affinity permease RbsD (TC 3.A.1.2.1)             |
| 288. | scaffold11 size4199117_2884871_2883534                                            | Monosaccharides | Xylose utilization                                          | Xylose isomerase (EC 5.3.1.5)                                                       |

|      |                                                                                |                 |                                                  |                                                                                                     |
|------|--------------------------------------------------------------------------------|-----------------|--------------------------------------------------|-----------------------------------------------------------------------------------------------------|
| 289. | scaffold11 size4199117_2883475_2881973                                         | Monosaccharides | Xylose utilization                               | Xylulose kinase (EC 2.7.1.17)                                                                       |
| 290. | scaffold11 size4199117_2885097_2886263                                         | Monosaccharides | Xylose utilization                               | Xylose-responsive transcription regulator, ROK family                                               |
|      | scaffold11 size4199117_2881671_2880250                                         | Monosaccharides | Xylose utilization                               | D-xylose proton-symporter XylE                                                                      |
| 291. | scaffold12 size137365_16269_15217                                              | Monosaccharides | D-Sorbitol(D-Glucitol) and L-Sorbose Utilization | PTS system, glucitol/sorbitol-specific IIB component and second of two IIC components (EC 2.7.1.69) |
| 292. | scaffold12 size137365_15184_14825                                              | Monosaccharides | D-Sorbitol(D-Glucitol) and L-Sorbose Utilization | PTS system, glucitol/sorbitol-specific IIA component (EC 2.7.1.69)                                  |
| 293. | scaffold12 size137365_16814_16287                                              | Monosaccharides | D-Sorbitol(D-Glucitol) and L-Sorbose Utilization | PTS system, glucitol/sorbitol-specific IIC component (EC 2.7.1.69)                                  |
| 294. | scaffold11 size4199117_2385161_2385931;<br>scaffold12 size137365_18634_17351   | Monosaccharides | D-Sorbitol(D-Glucitol) and L-Sorbose Utilization | Sorbitol-6-phosphate 2-dehydrogenase (EC 1.1.1.140)                                                 |
| 295. | scaffold12 size137365_14768_13830                                              | Monosaccharides | D-Sorbitol(D-Glucitol) and L-Sorbose Utilization | Sorbitol operon transcription regulator                                                             |
| 296. | scaffold11 size4199117_1310309_1311007                                         | Monosaccharides | L-Arabinose utilization                          | L-ribulose-5-phosphate 4-epimerase (EC 5.1.3.4)                                                     |
| 297. | scaffold11 size4199117_1308684_1310315                                         | Monosaccharides | L-Arabinose utilization                          | Ribulokinase (EC 2.7.1.16)                                                                          |
| 298. | scaffold11 size4199117_1311038_1312462                                         | Monosaccharides | L-Arabinose utilization                          | L-arabinose isomerase (EC 5.3.1.4)                                                                  |
| 299. | scaffold11 size4199117_1308344_1307238                                         | Monosaccharides | L-Arabinose utilization                          | Transcriptional repressor of arabinoside utilization operon, GntR family                            |
| 300. | Scaffold10 size375231_311160_312545;<br>scaffold11 size4199117_1312608_1313987 | Monosaccharides | L-Arabinose utilization                          | Arabinose-proton symporter                                                                          |

Table S14. Phosphorous metabolism genes in *B.aryabhatai* AB211

| No | Contig_id/Size/start-end                                                        | Subcategory                            | Subsystem                                                      | Function (EC No.)                                                                    |
|----|---------------------------------------------------------------------------------|----------------------------------------|----------------------------------------------------------------|--------------------------------------------------------------------------------------|
| 1  | scaffold11 size4199117_4024708_4022867                                          | Phosphorus Metabolism - no subcategory | Phosphoenolpyruvatephosphomutase                               | 2-aminoethylphosphonate:pyruvate aminotransferase (EC 2.6.1.37)                      |
| 2  | scaffold11 size4199117_4027341_4025824                                          | Phosphorus Metabolism - no subcategory | Phosphoenolpyruvatephosphomutase                               | Phosphoenolpyruvatephosphomutase (EC 5.4.2.9)                                        |
| 3  | scaffold11 size4199117_4025831_4024701                                          | Phosphorus Metabolism - no subcategory | Phosphoenolpyruvatephosphomutase                               | Phosphonopyruvate decarboxylase (EC 4.1.1.82)                                        |
| 4  | scaffold11 size4199117_286524_287411                                            | Phosphorus Metabolism - no subcategory | High affinity phosphate transporter and control of PHO regulon | Phosphate transport system permease protein PstC (TC 3.A.1.7.1)                      |
| 5  | scaffold11 size4199117_383932_384741                                            | Phosphorus Metabolism - no subcategory | High affinity phosphate transporter and control of PHO regulon | Phosphate transport ATP-binding protein PstB (TC 3.A.1.7.1)                          |
| 6  | scaffold11 size4199117_287408_288337                                            | Phosphorus Metabolism - no subcategory | High affinity phosphate transporter and control of PHO regulon | Phosphate transport system permease protein PstA (TC 3.A.1.7.1)                      |
| 7  | scaffold11 size4199117_384764_385423                                            | Phosphorus Metabolism - no subcategory | High affinity phosphate transporter and control of PHO regulon | Phosphate transport system regulatory protein PhoU                                   |
| 8  | scaffold11 size4199117_138048_138785;<br>scaffold11 size4199117_1837122_1837874 | Phosphorus Metabolism - no subcategory | High affinity phosphate transporter and control of PHO regulon | Alkaline phosphatase synthesis transcriptional regulatory protein PhoP               |
| 9  | scaffold11 size4199117_285515_286399                                            | Phosphorus Metabolism - no subcategory | High affinity phosphate transporter and control of PHO regulon | Phosphate ABC transporter, periplasmic phosphate-binding protein PstS (TC 3.A.1.7.1) |
| 10 | scaffold11 size4199117_3474489_3472366                                          | Phosphorus Metabolism - no subcategory | High affinity phosphate transporter and control of PHO regulon | Polyphosphate kinase (EC 2.7.4.1)                                                    |
| 11 | scaffold11 size4199117_138778_140550;<br>scaffold11 size4199117_1403484_1404947 | Phosphorus Metabolism - no subcategory | High affinity phosphate transporter and control of PHO regulon | Phosphate regulon sensor protein PhoR (SphS) (EC 2.7.13.3)                           |
| 12 | scaffold11 size4199117_3476089_3474563                                          | Phosphorus Metabolism - no subcategory | Phosphate metabolism                                           | Exopolyphosphatase (EC 3.6.1.11)                                                     |

|    |                                                                                   |                                           |                      |                                                                                |
|----|-----------------------------------------------------------------------------------|-------------------------------------------|----------------------|--------------------------------------------------------------------------------|
| 13 | scaffold11 size4199117_349670_350644                                              | Phosphorus Metabolism -<br>no subcategory | Phosphate metabolism | Phosphate starvation-<br>inducible protein PhoH,<br>predicted ATPase           |
| 14 | scaffold11 size4199117_2207686_2208612                                            | Phosphorus Metabolism -<br>no subcategory | Phosphate metabolism | Manganese-dependent<br>inorganic pyrophosphatase<br>(EC 3.6.1.1)               |
| 15 | scaffold11 size4199117_3432243_3430915                                            | Phosphorus Metabolism -<br>no subcategory | Phosphate metabolism | Predicted ATPase related to<br>phosphate starvation-<br>inducible protein PhoH |
| 16 | Scaffold10 size375231_328586_330484;<br>scaffold11 size4199117_3574812_3573157    | Phosphorus Metabolism -<br>no subcategory | Phosphate metabolism | Alkaline phosphatase (EC<br>3.1.3.1)                                           |
| 18 | scaffold11 size4199117_3119956_3121266;<br>scaffold11 size4199117_4192229_4191612 | Phosphorus Metabolism -<br>no subcategory | Phosphate metabolism | Alkaline phosphatase like<br>protein                                           |
| 19 | Scaffold10 size375231_141147_140500                                               | Phosphorus Metabolism -<br>no subcategory | Phosphate metabolism | PyrophosphatasePpaX (EC<br>3.6.1.1)                                            |

Table S15. Tryptophan/Auxin/Acetoin/2,3-butandiol biosynthesis genes in *B. aryabhatai* AB211

| No | Contig_id/Size/start-end                                                                                                   | Subcategory                          | Subsystem                      | Function (EC No.)                                                                               |
|----|----------------------------------------------------------------------------------------------------------------------------|--------------------------------------|--------------------------------|-------------------------------------------------------------------------------------------------|
| 1  | scaffold11 size4199117_558425_559939                                                                                       | Aromatic amino acids and derivatives | Tryptophan synthesis/auxin     | Anthranilate synthase, aminase component (EC 4.1.3.27)                                          |
| 2  | scaffold11 size4199117_559932_560957;<br>scaffold11 size4199117_1770755_1771795                                            | Aromatic amino acids and derivatives | Tryptophan synthesis/auxin     | Anthranilatephosphoribosyltransferase (EC 2.4.2.18)                                             |
| 3  | scaffold11 size4199117_561704_562330                                                                                       | Aromatic amino acids and derivatives | Tryptophan synthesis/auxin     | Phosphoribosylanthranilateisomerase (EC 5.3.1.24)                                               |
| 4  | scaffold11 size4199117_560947_561714                                                                                       | Aromatic amino acids and derivatives | Tryptophan synthesis/auxin     | Indole-3-glycerol phosphate synthase (EC 4.1.1.48)                                              |
| 5  | scaffold11 size4199117_563528_564343                                                                                       | Aromatic amino acids and derivatives | Tryptophan synthesis/auxin     | Tryptophan synthase alpha chain (EC 4.2.1.20)                                                   |
| 6  | scaffold11 size4199117_563528_564343                                                                                       | Aromatic amino acids and derivatives | Tryptophan synthesis/auxin     | Tryptophan synthase beta chain (EC 4.2.1.20)                                                    |
| 7  | scaffold11 size4199117_562327_563541                                                                                       | IAA production                       | Tryptophan synthesis/auxin     | Nitrilase/cyanide hydratase and apolipoprotein N-acyltransferase (EC:3.5.5.1)                   |
| 8  | scaffold11 size4199117_3783159_3782401                                                                                     | Fermentation                         | Acetoin, butanediol metabolism | Acetolactate synthase, catabolic (EC 2.2.1.6)                                                   |
| 9  | scaffold11 size4199117_2860360_2859326                                                                                     | Fermentation                         | Acetoin, butanediol metabolism | Acetoin dehydrogenase E1 component beta-subunit (EC 1.2.4.-)                                    |
| 10 | scaffold11 size4199117_2861371_2860379                                                                                     | Fermentation                         | Acetoin, butanediol metabolism | Acetoin dehydrogenase E1 component alpha-subunit (EC 1.2.4.-)                                   |
| 11 | scaffold11 size4199117_1420874_1419828                                                                                     | Fermentation                         | Acetoin, butanediol metabolism | 2,3-butanediol dehydrogenase, R-alcohol forming, (R)- and (S)-acetoin-specific (EC 1.1.1.4)     |
| 12 | scaffold11 size4199117_2856414_2854537                                                                                     | Fermentation                         | Acetoin, butanediol metabolism | Transcriptional activator of acetoin dehydrogenase operon AcoR                                  |
| 13 | scaffold11 size4199117_204286_206004;<br>scaffold11 size4199117_3077198_3075603;<br>scaffold11 size4199117_3855293_3853536 | Fermentation                         | Acetoin, butanediol metabolism | Acetolactate synthase large subunit (EC 2.2.1.6)                                                |
| 14 | scaffold11 size4199117_4021613_4022326                                                                                     | Fermentation                         | Acetoin, butanediol metabolism | Alpha-acetolactate decarboxylase (EC 4.1.1.5)                                                   |
| 15 | scaffold11 size4199117_2859300_2858074                                                                                     | Fermentation                         | Acetoin, butanediol metabolism | Dihydrolipoamide acetyltransferase component (E2) of acetoin dehydrogenase complex (EC 2.3.1.-) |

|    |                                        |                                 |                                |                                                                      |
|----|----------------------------------------|---------------------------------|--------------------------------|----------------------------------------------------------------------|
| 16 | scaffold11 size4199117_206001_206513   | Fermentation                    | Acetoin, butanediol metabolism | Acetolactate synthase small subunit (EC 2.2.1.6)                     |
| 17 | scaffold11 size4199117_2858057_2856678 | Central carbohydrate metabolism | Dehydrogenase complexes        | Dihydrolipoamide dehydrogenase of acetoin dehydrogenase (EC 1.8.1.4) |
